# Supplementary material
Source: PubMed Central journal article supplement (PMC5607366)

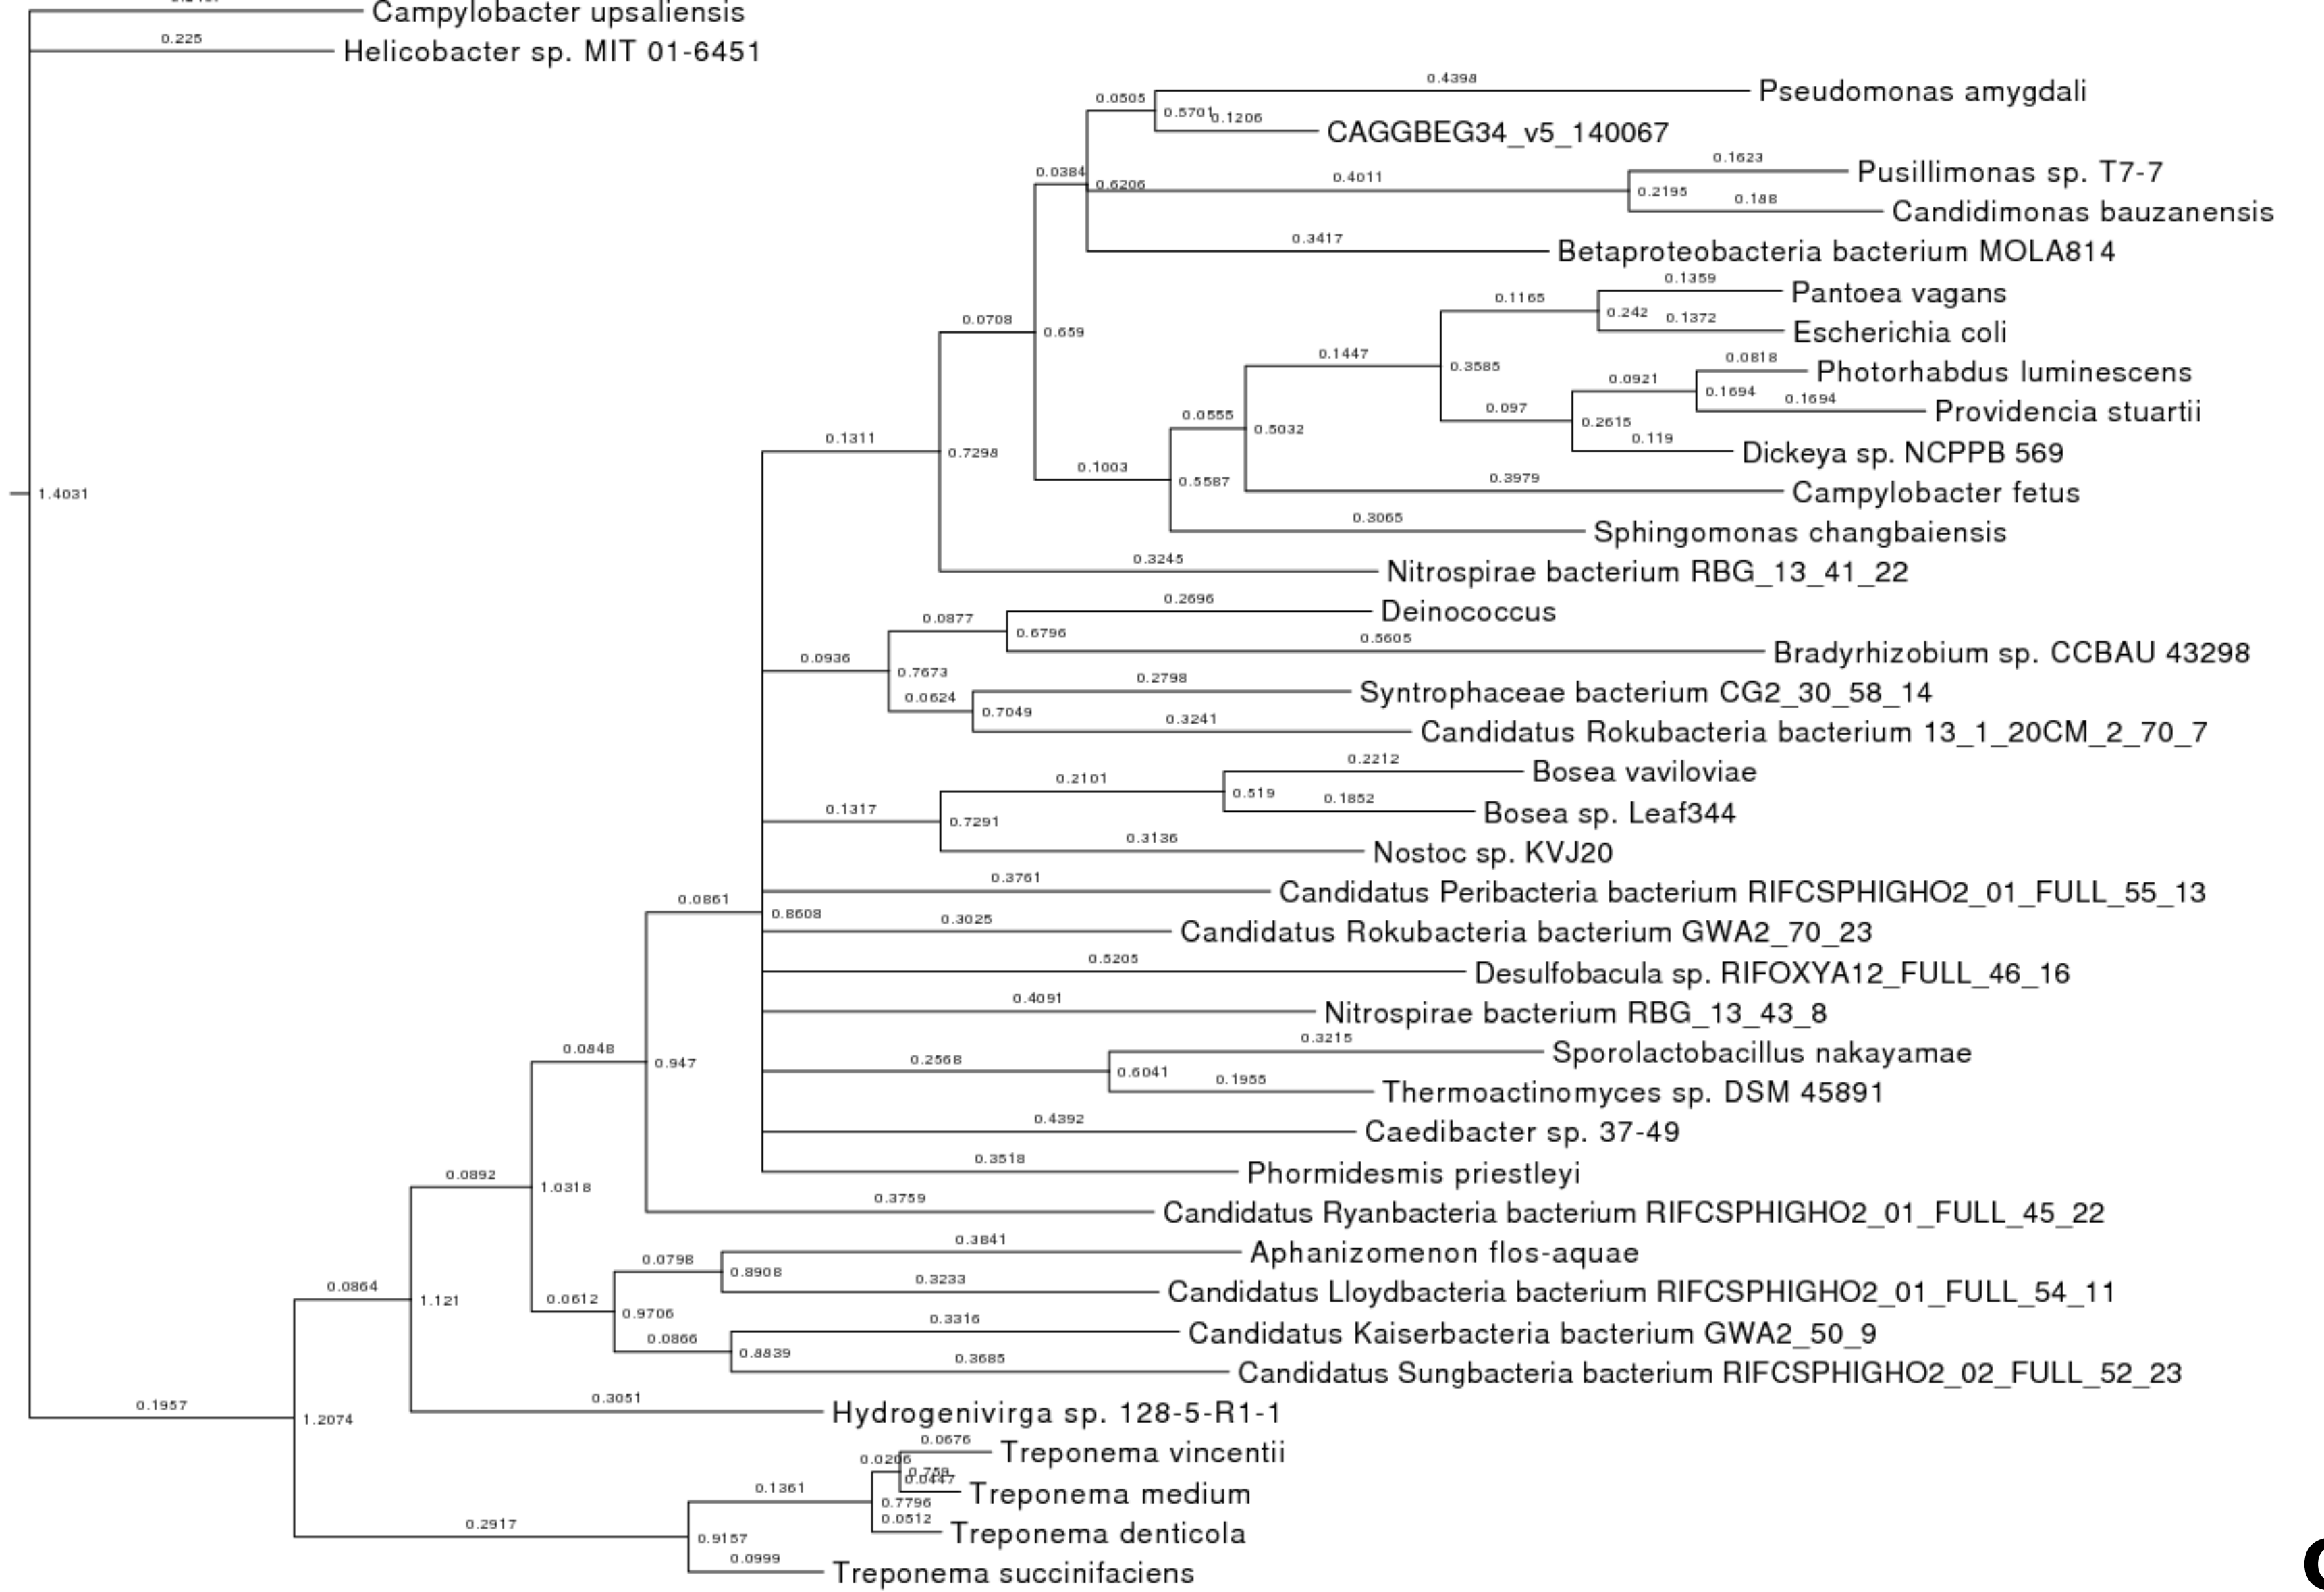

# ChpA/ChpR

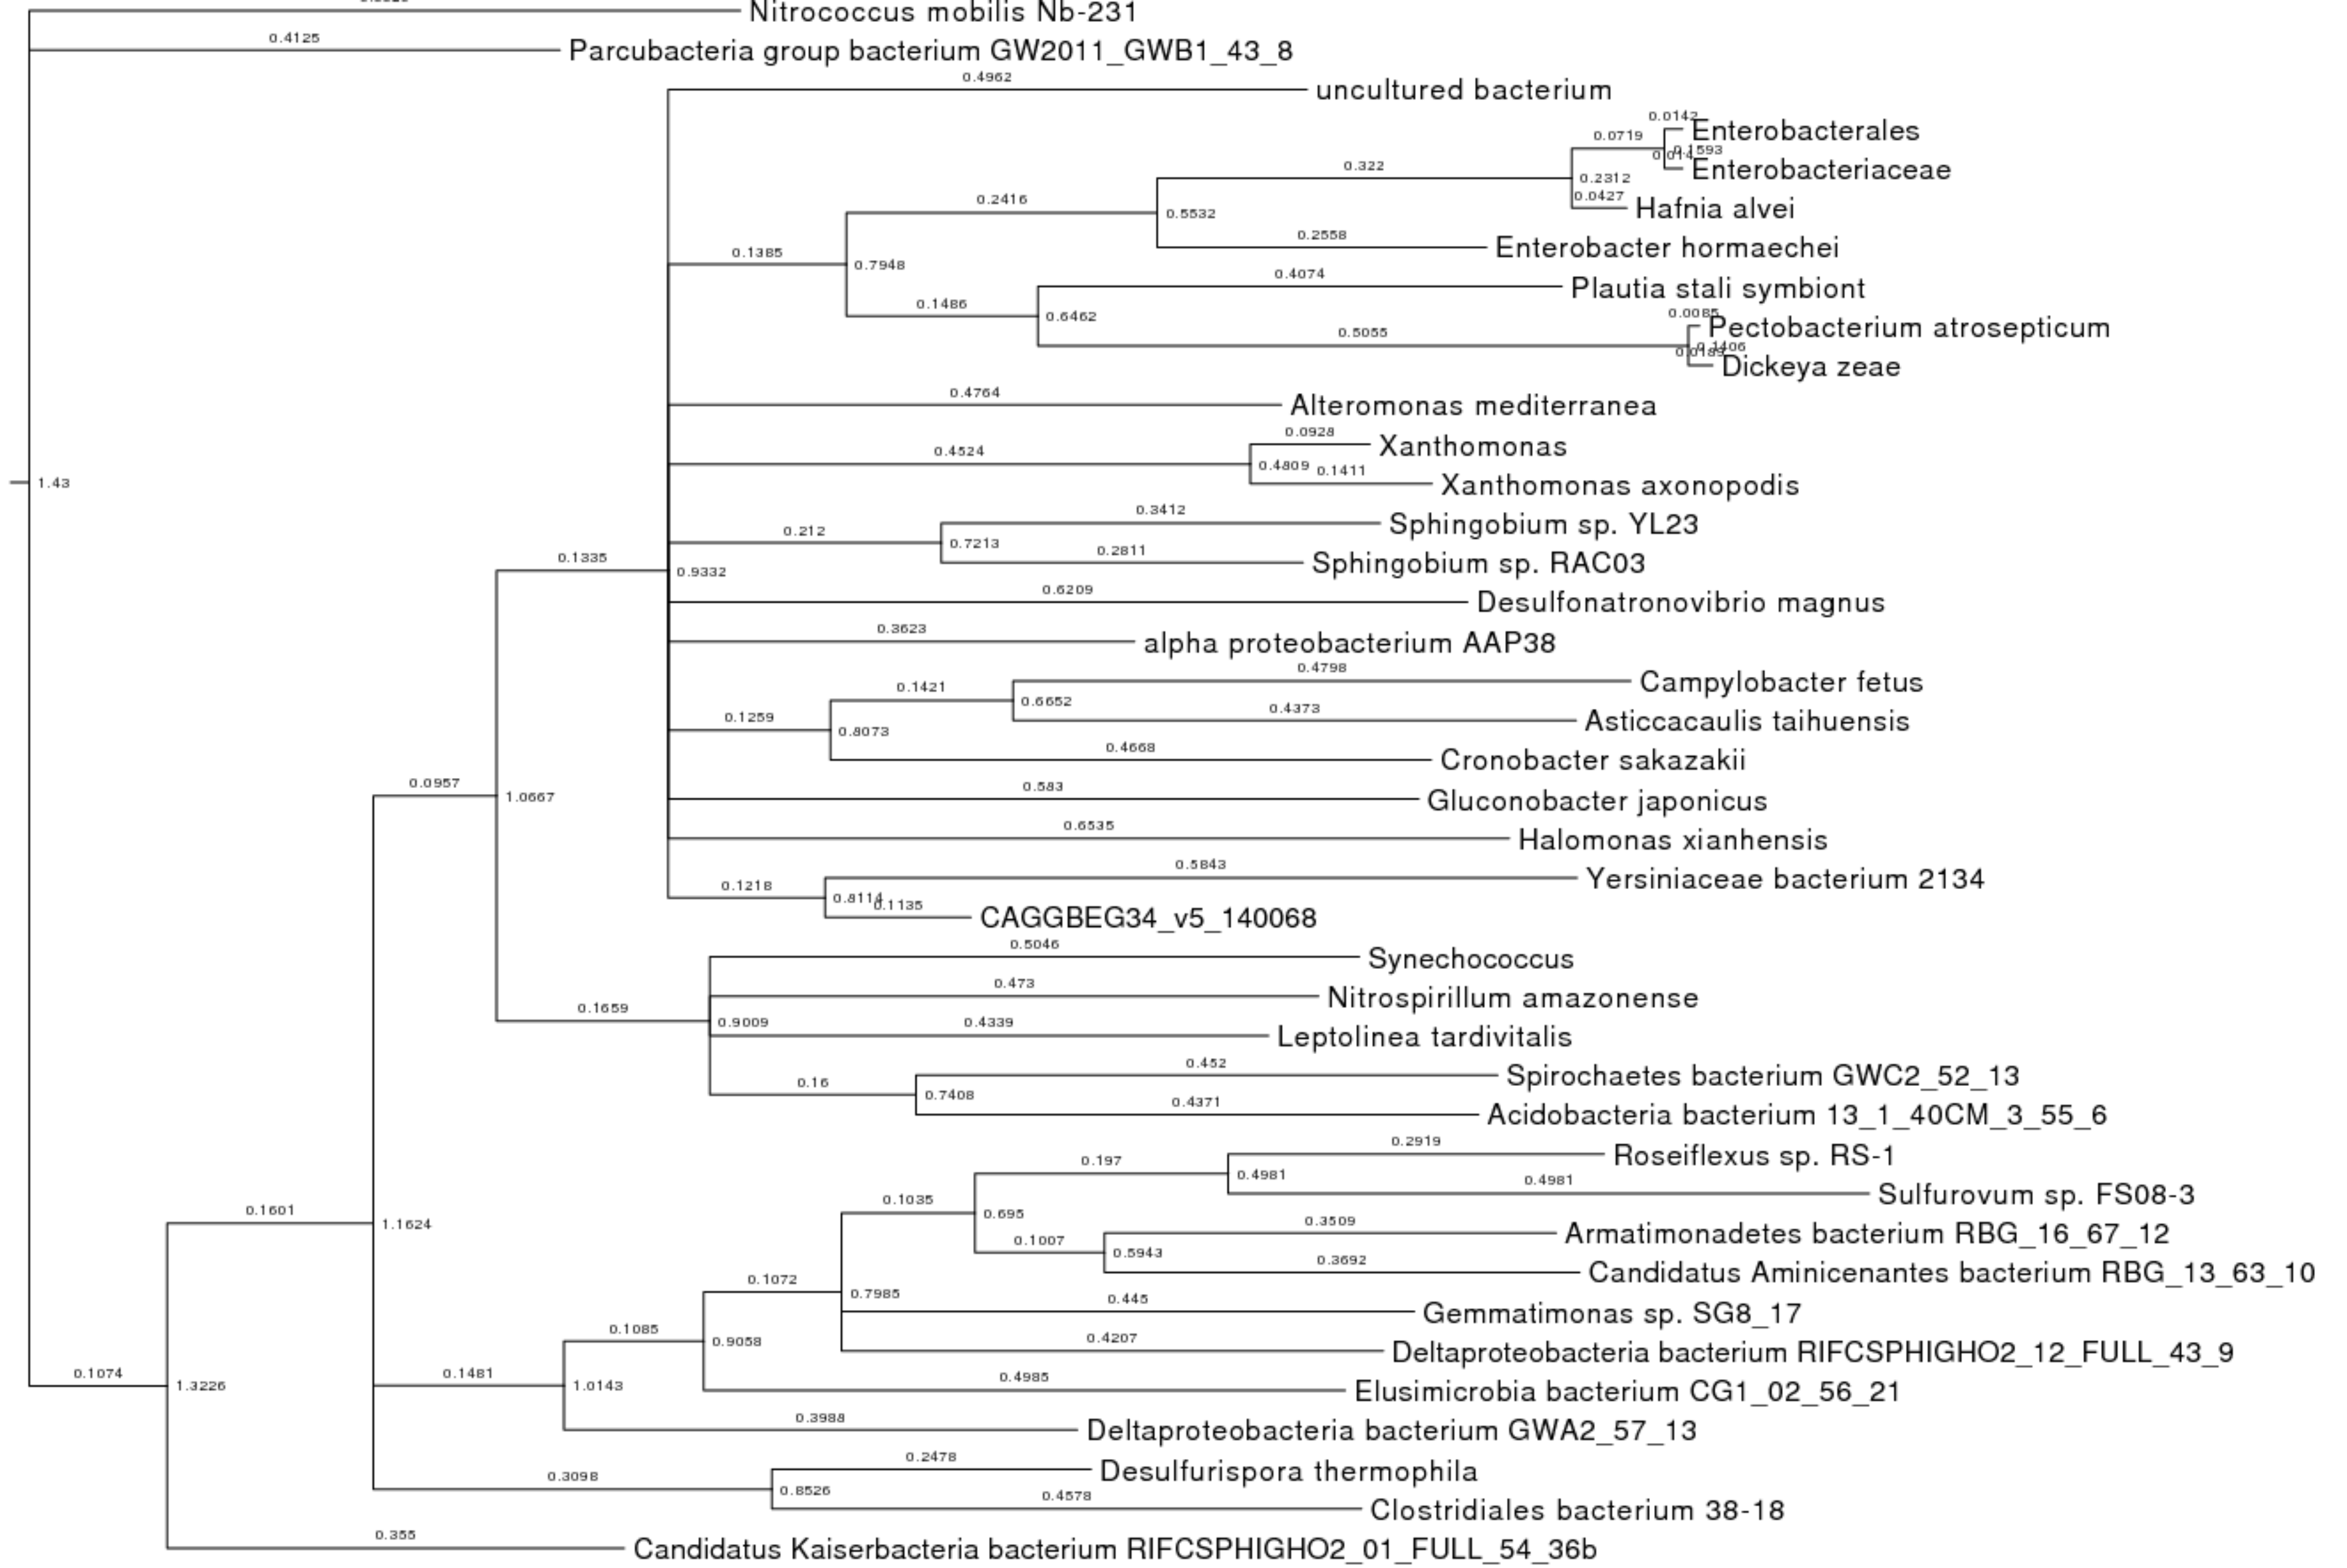

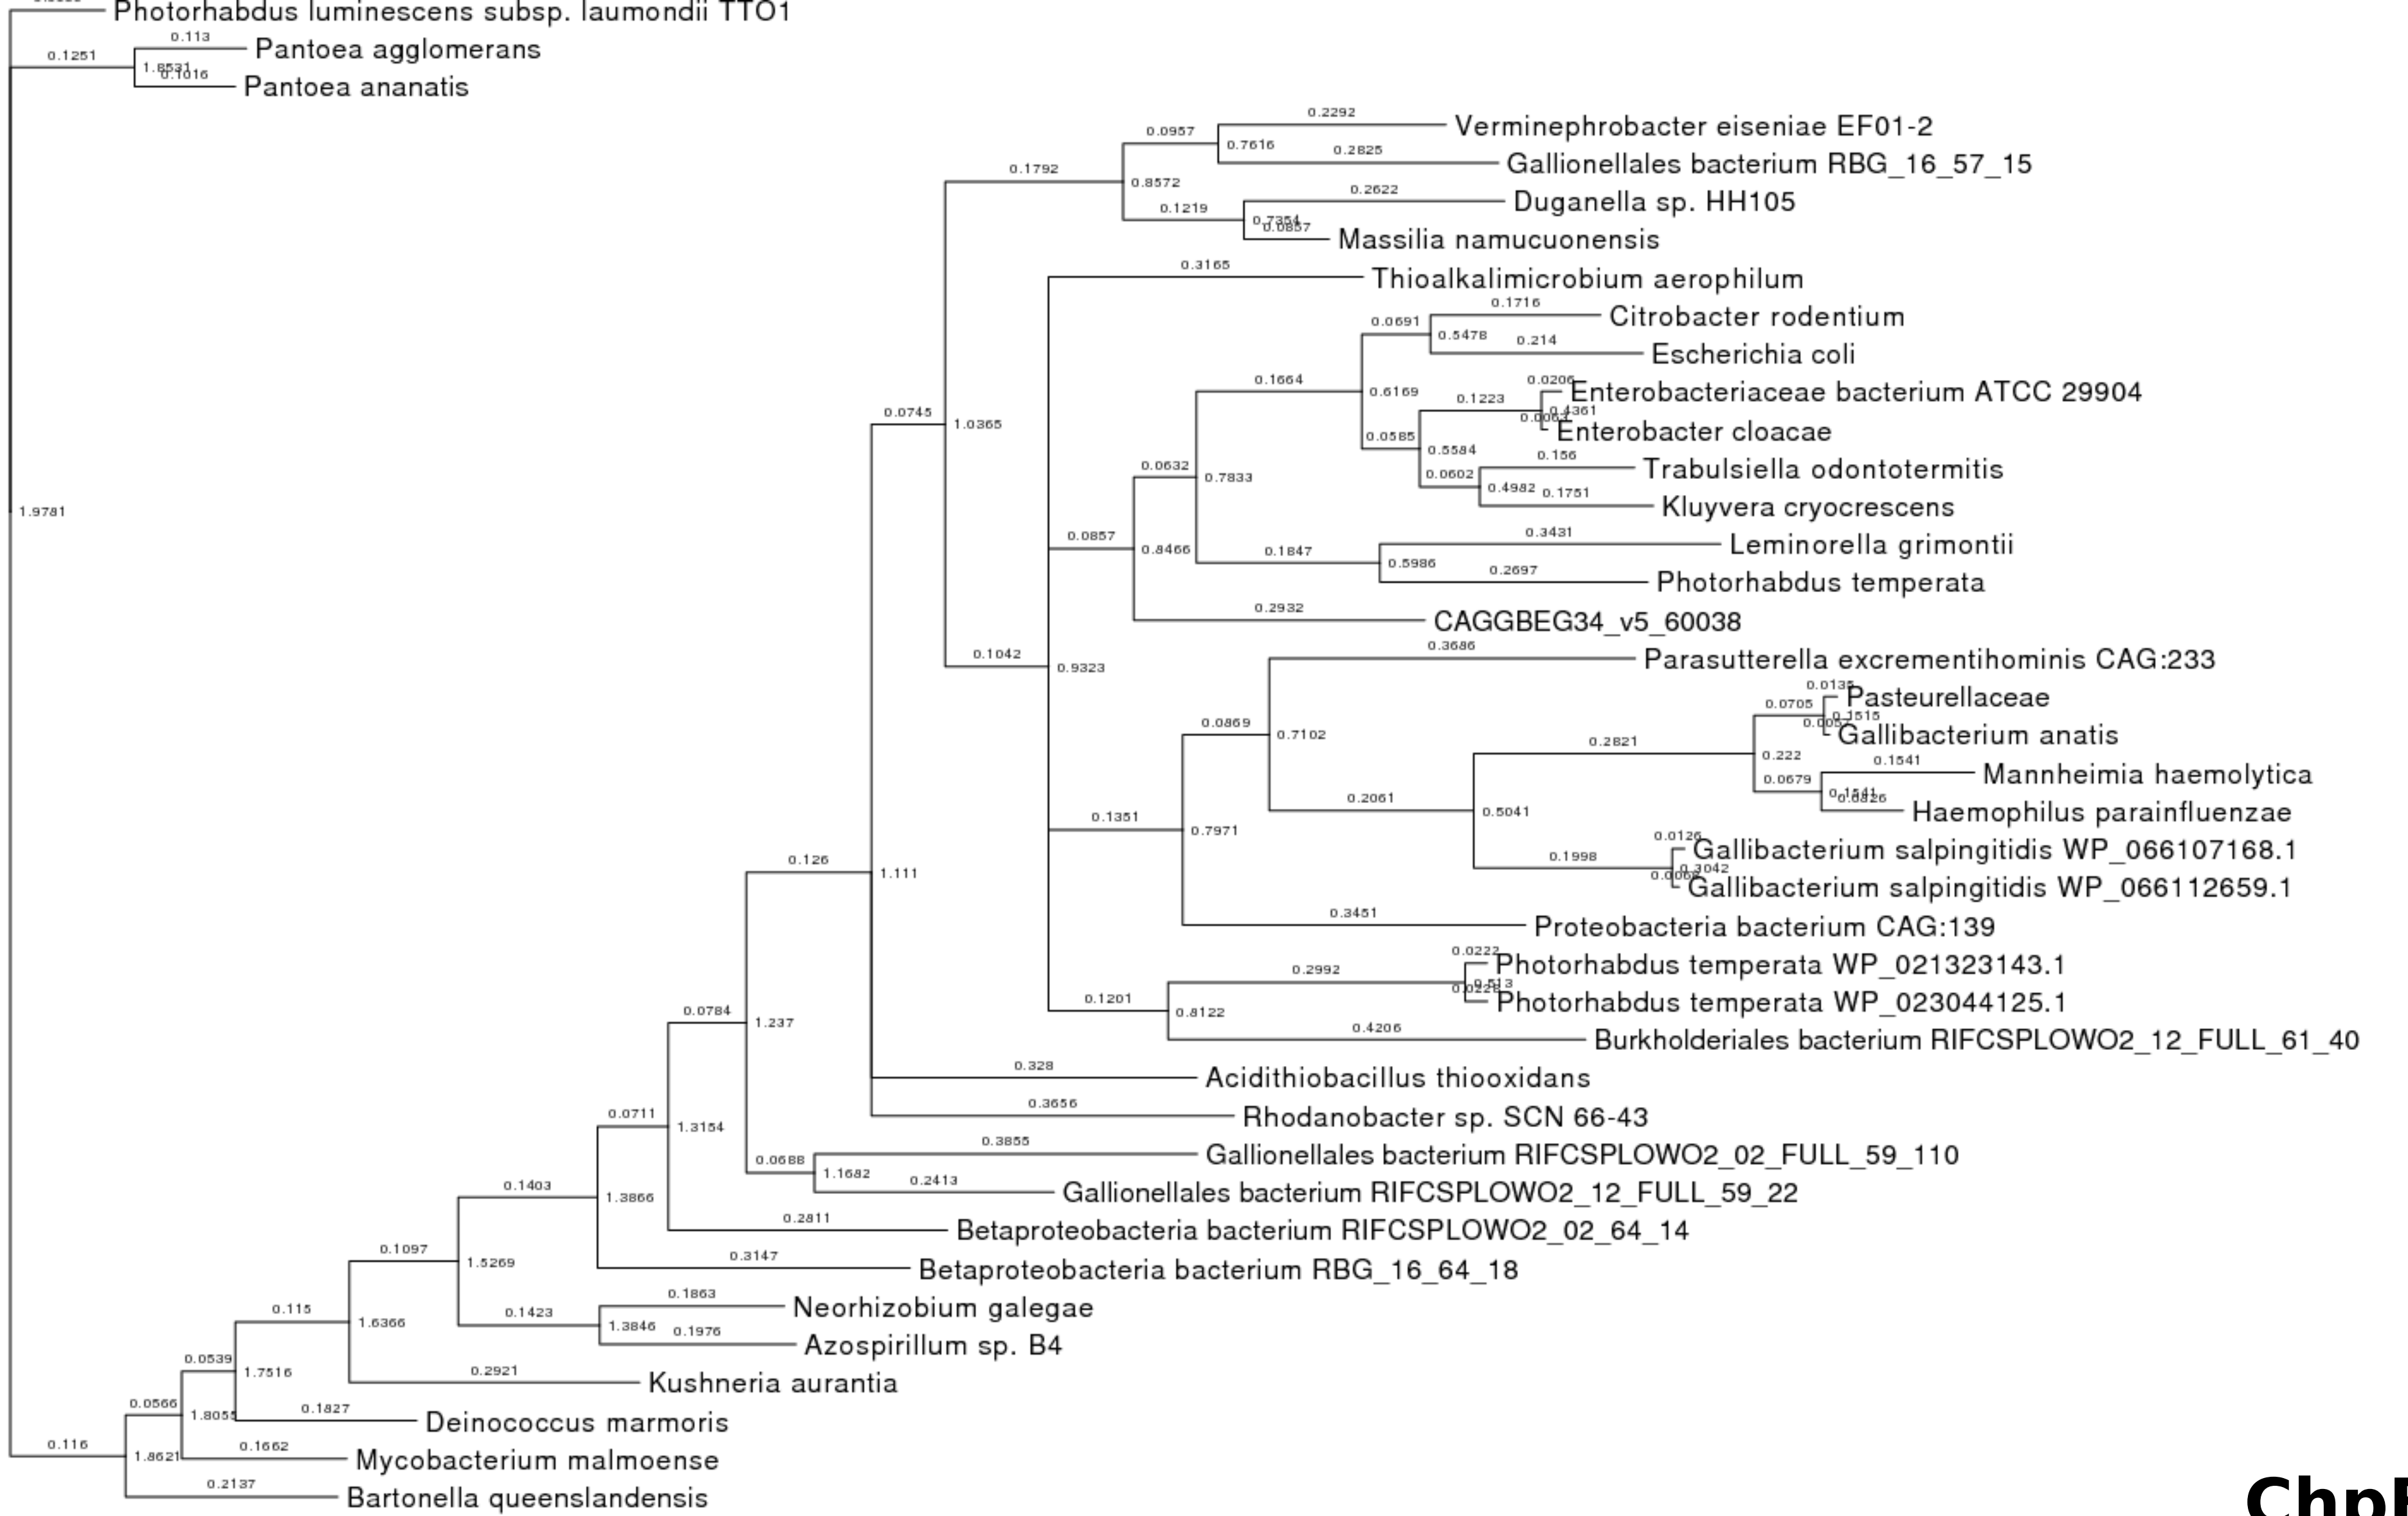

## ChpB/ChpS

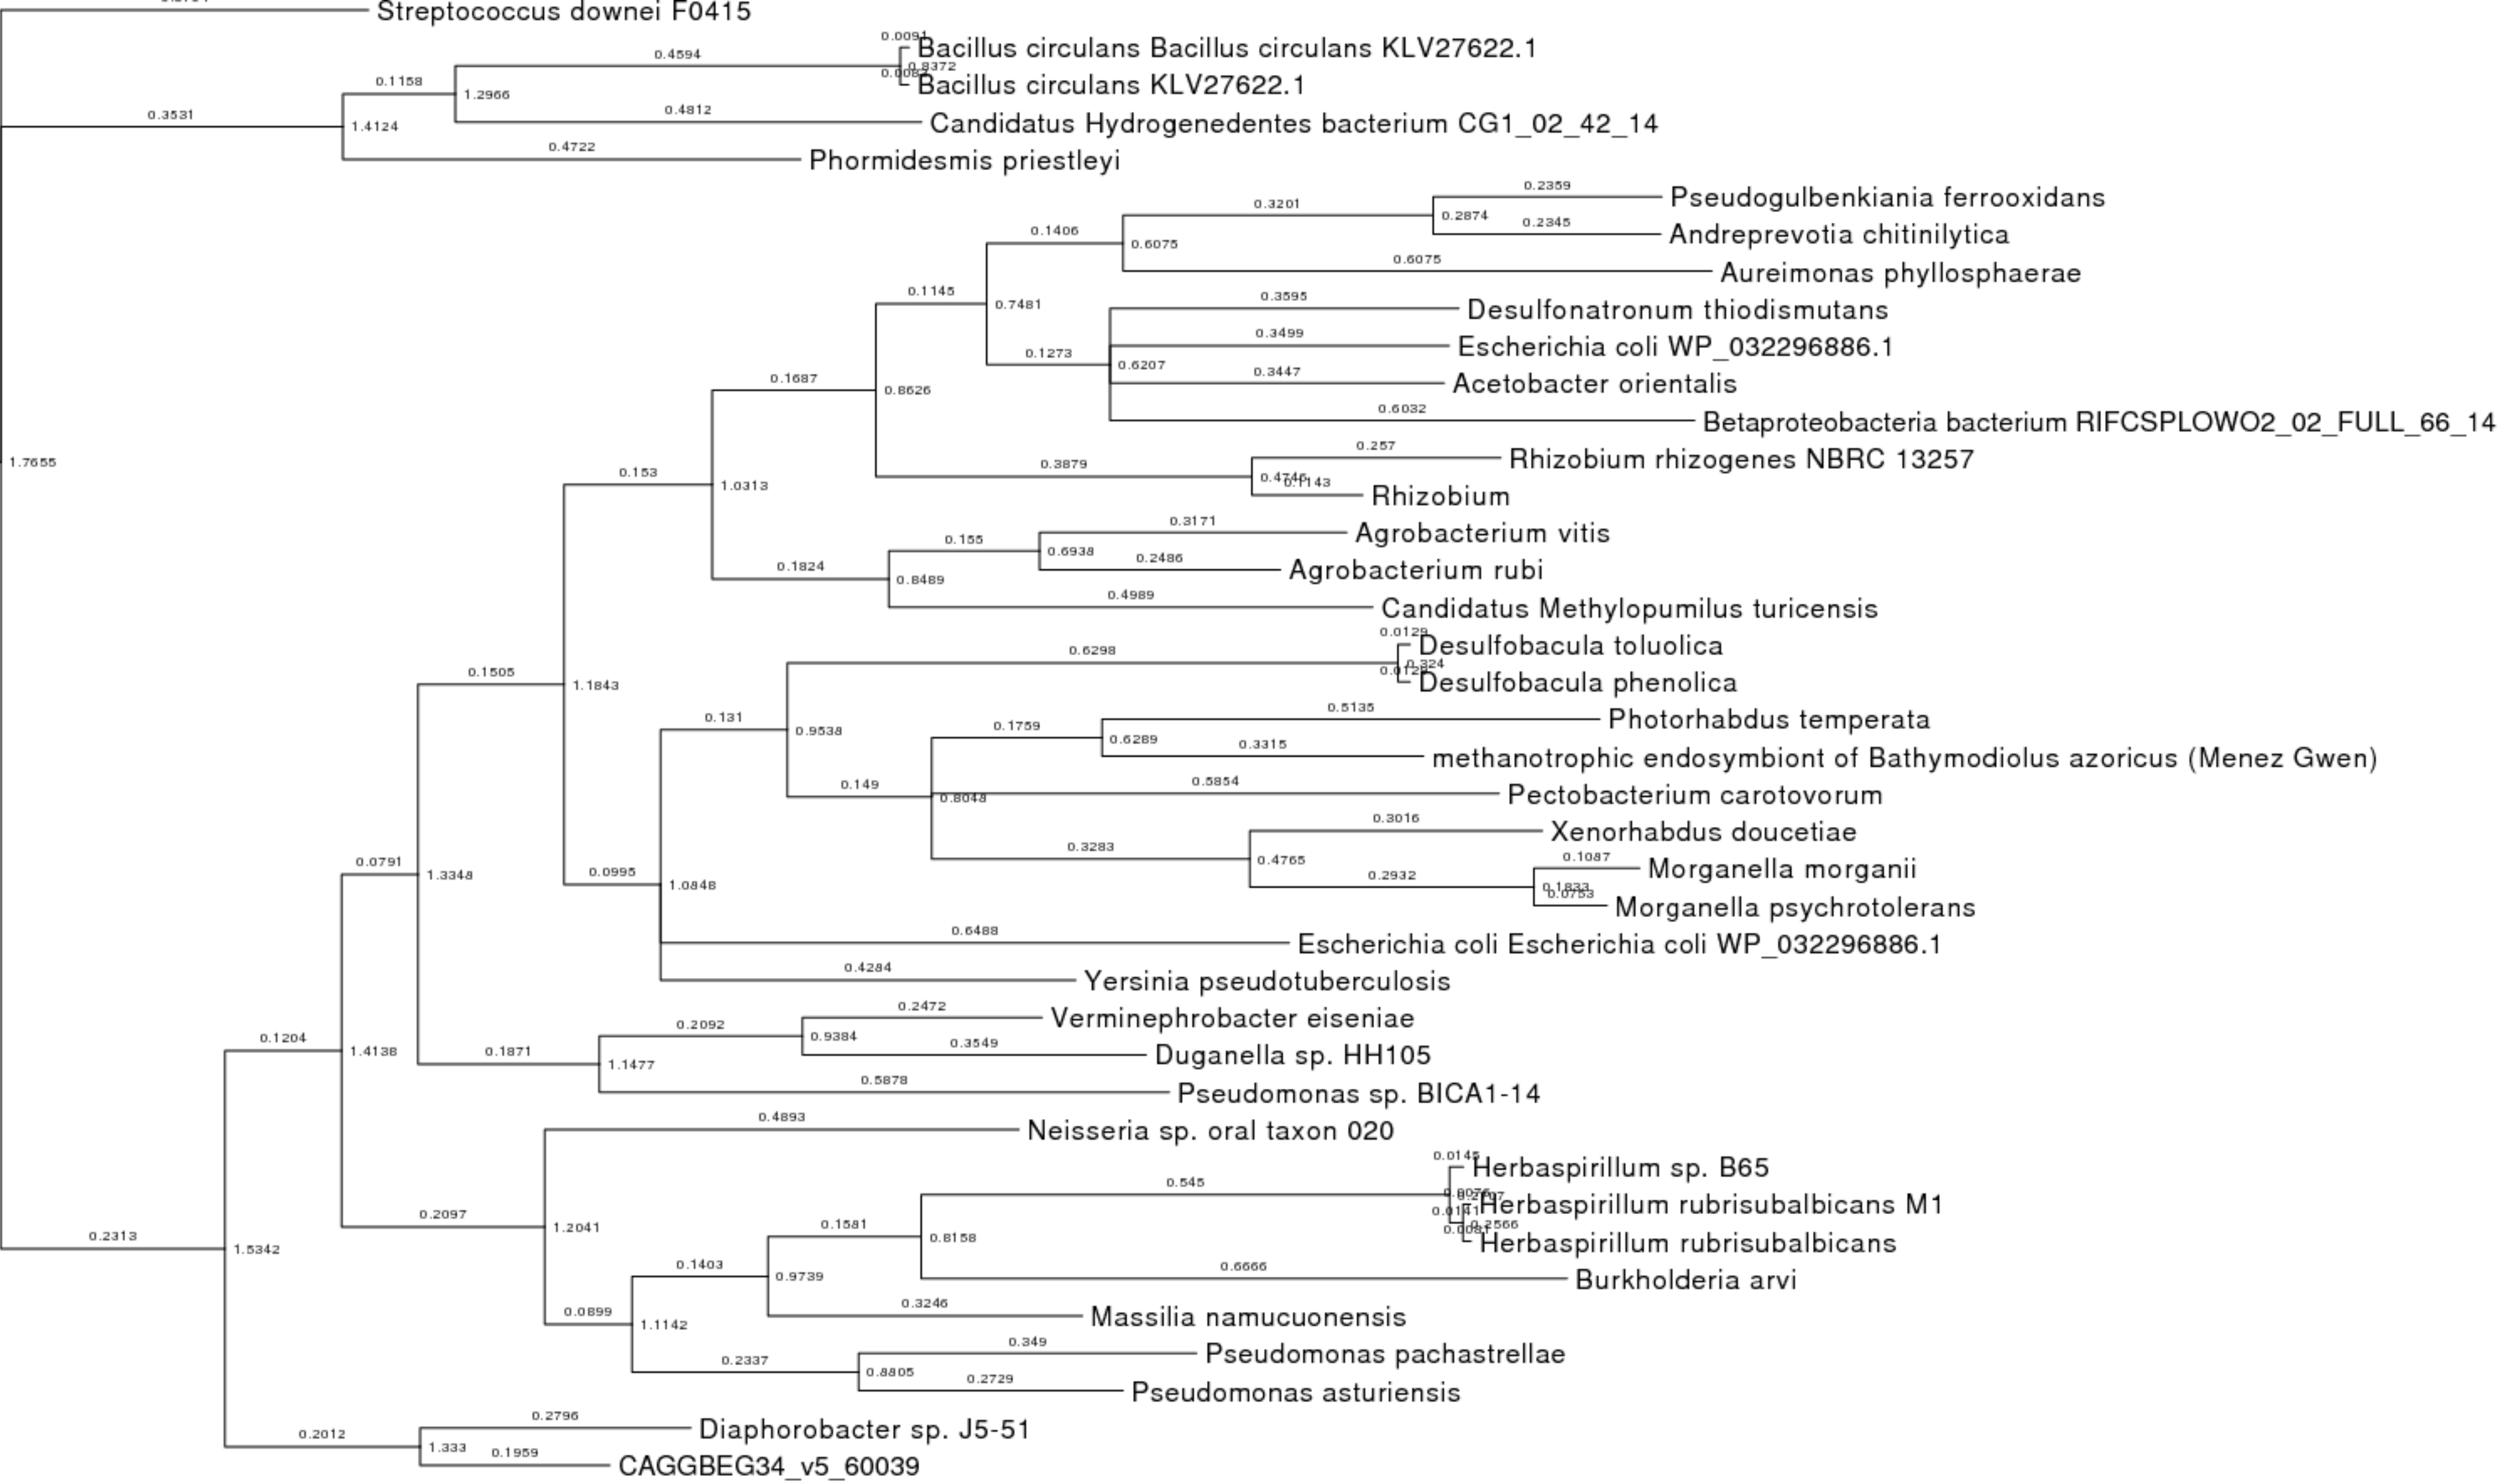

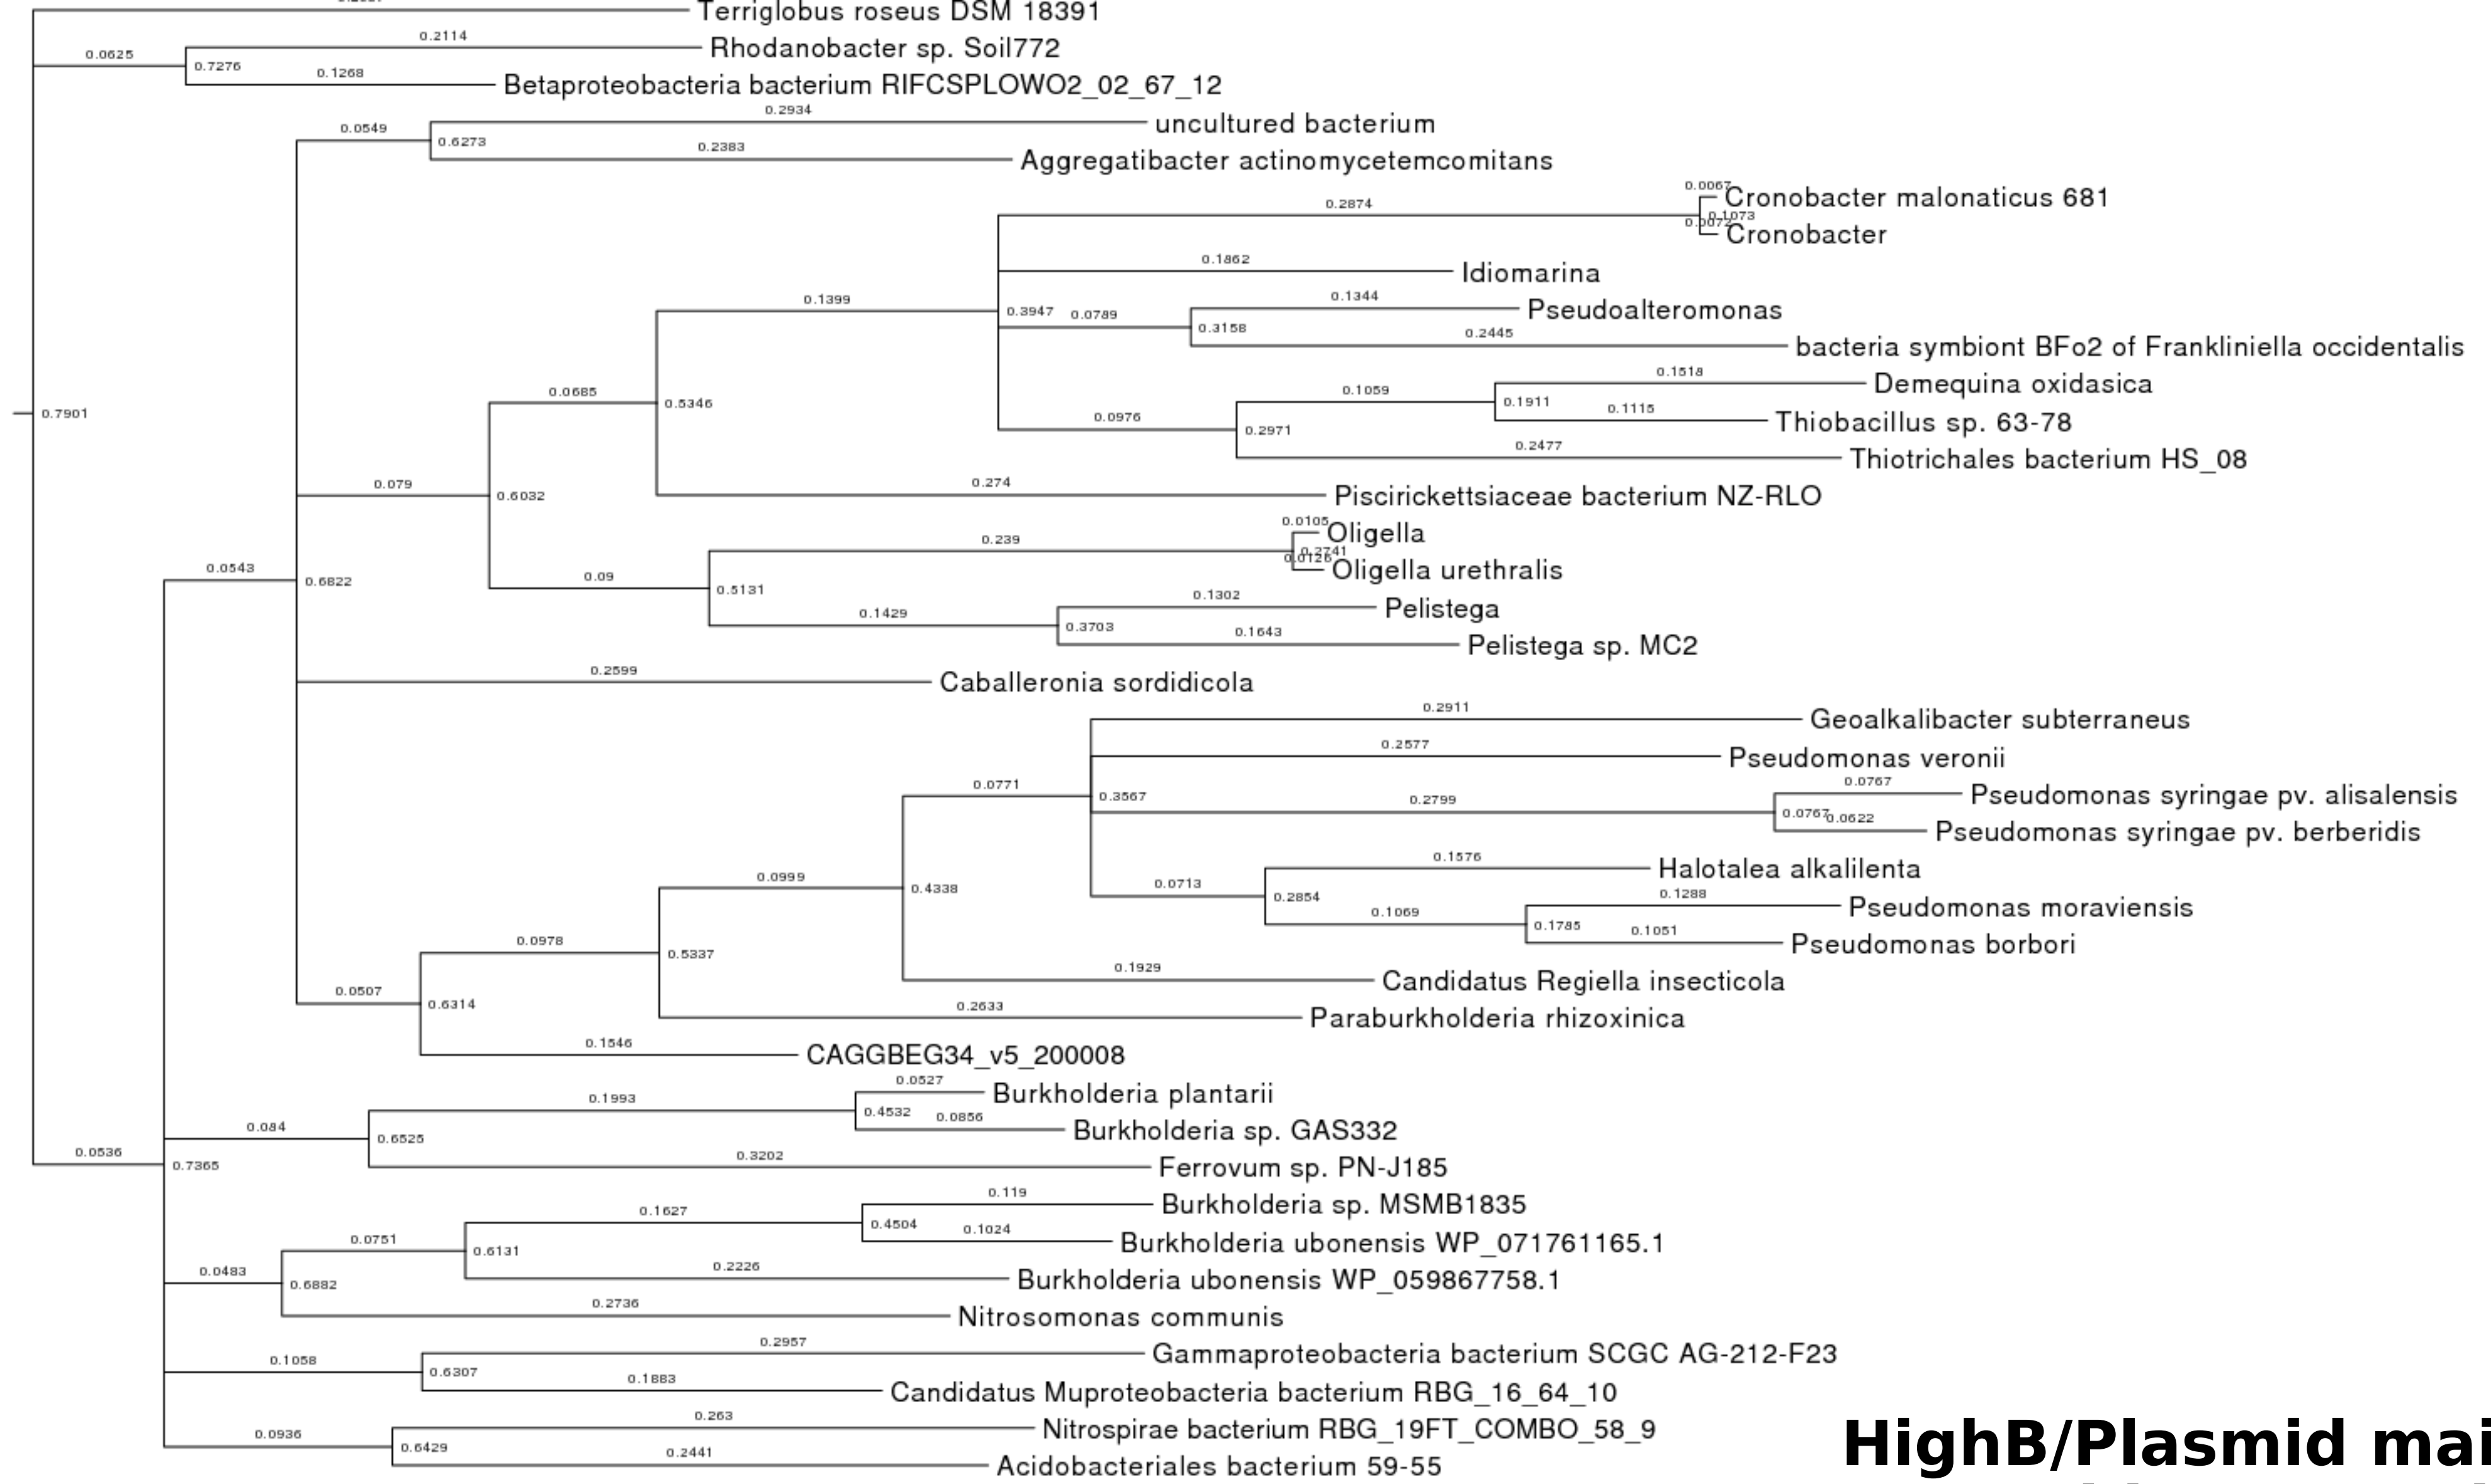

**HighB/Plasmid maintenance system antidote protein, XRE family**

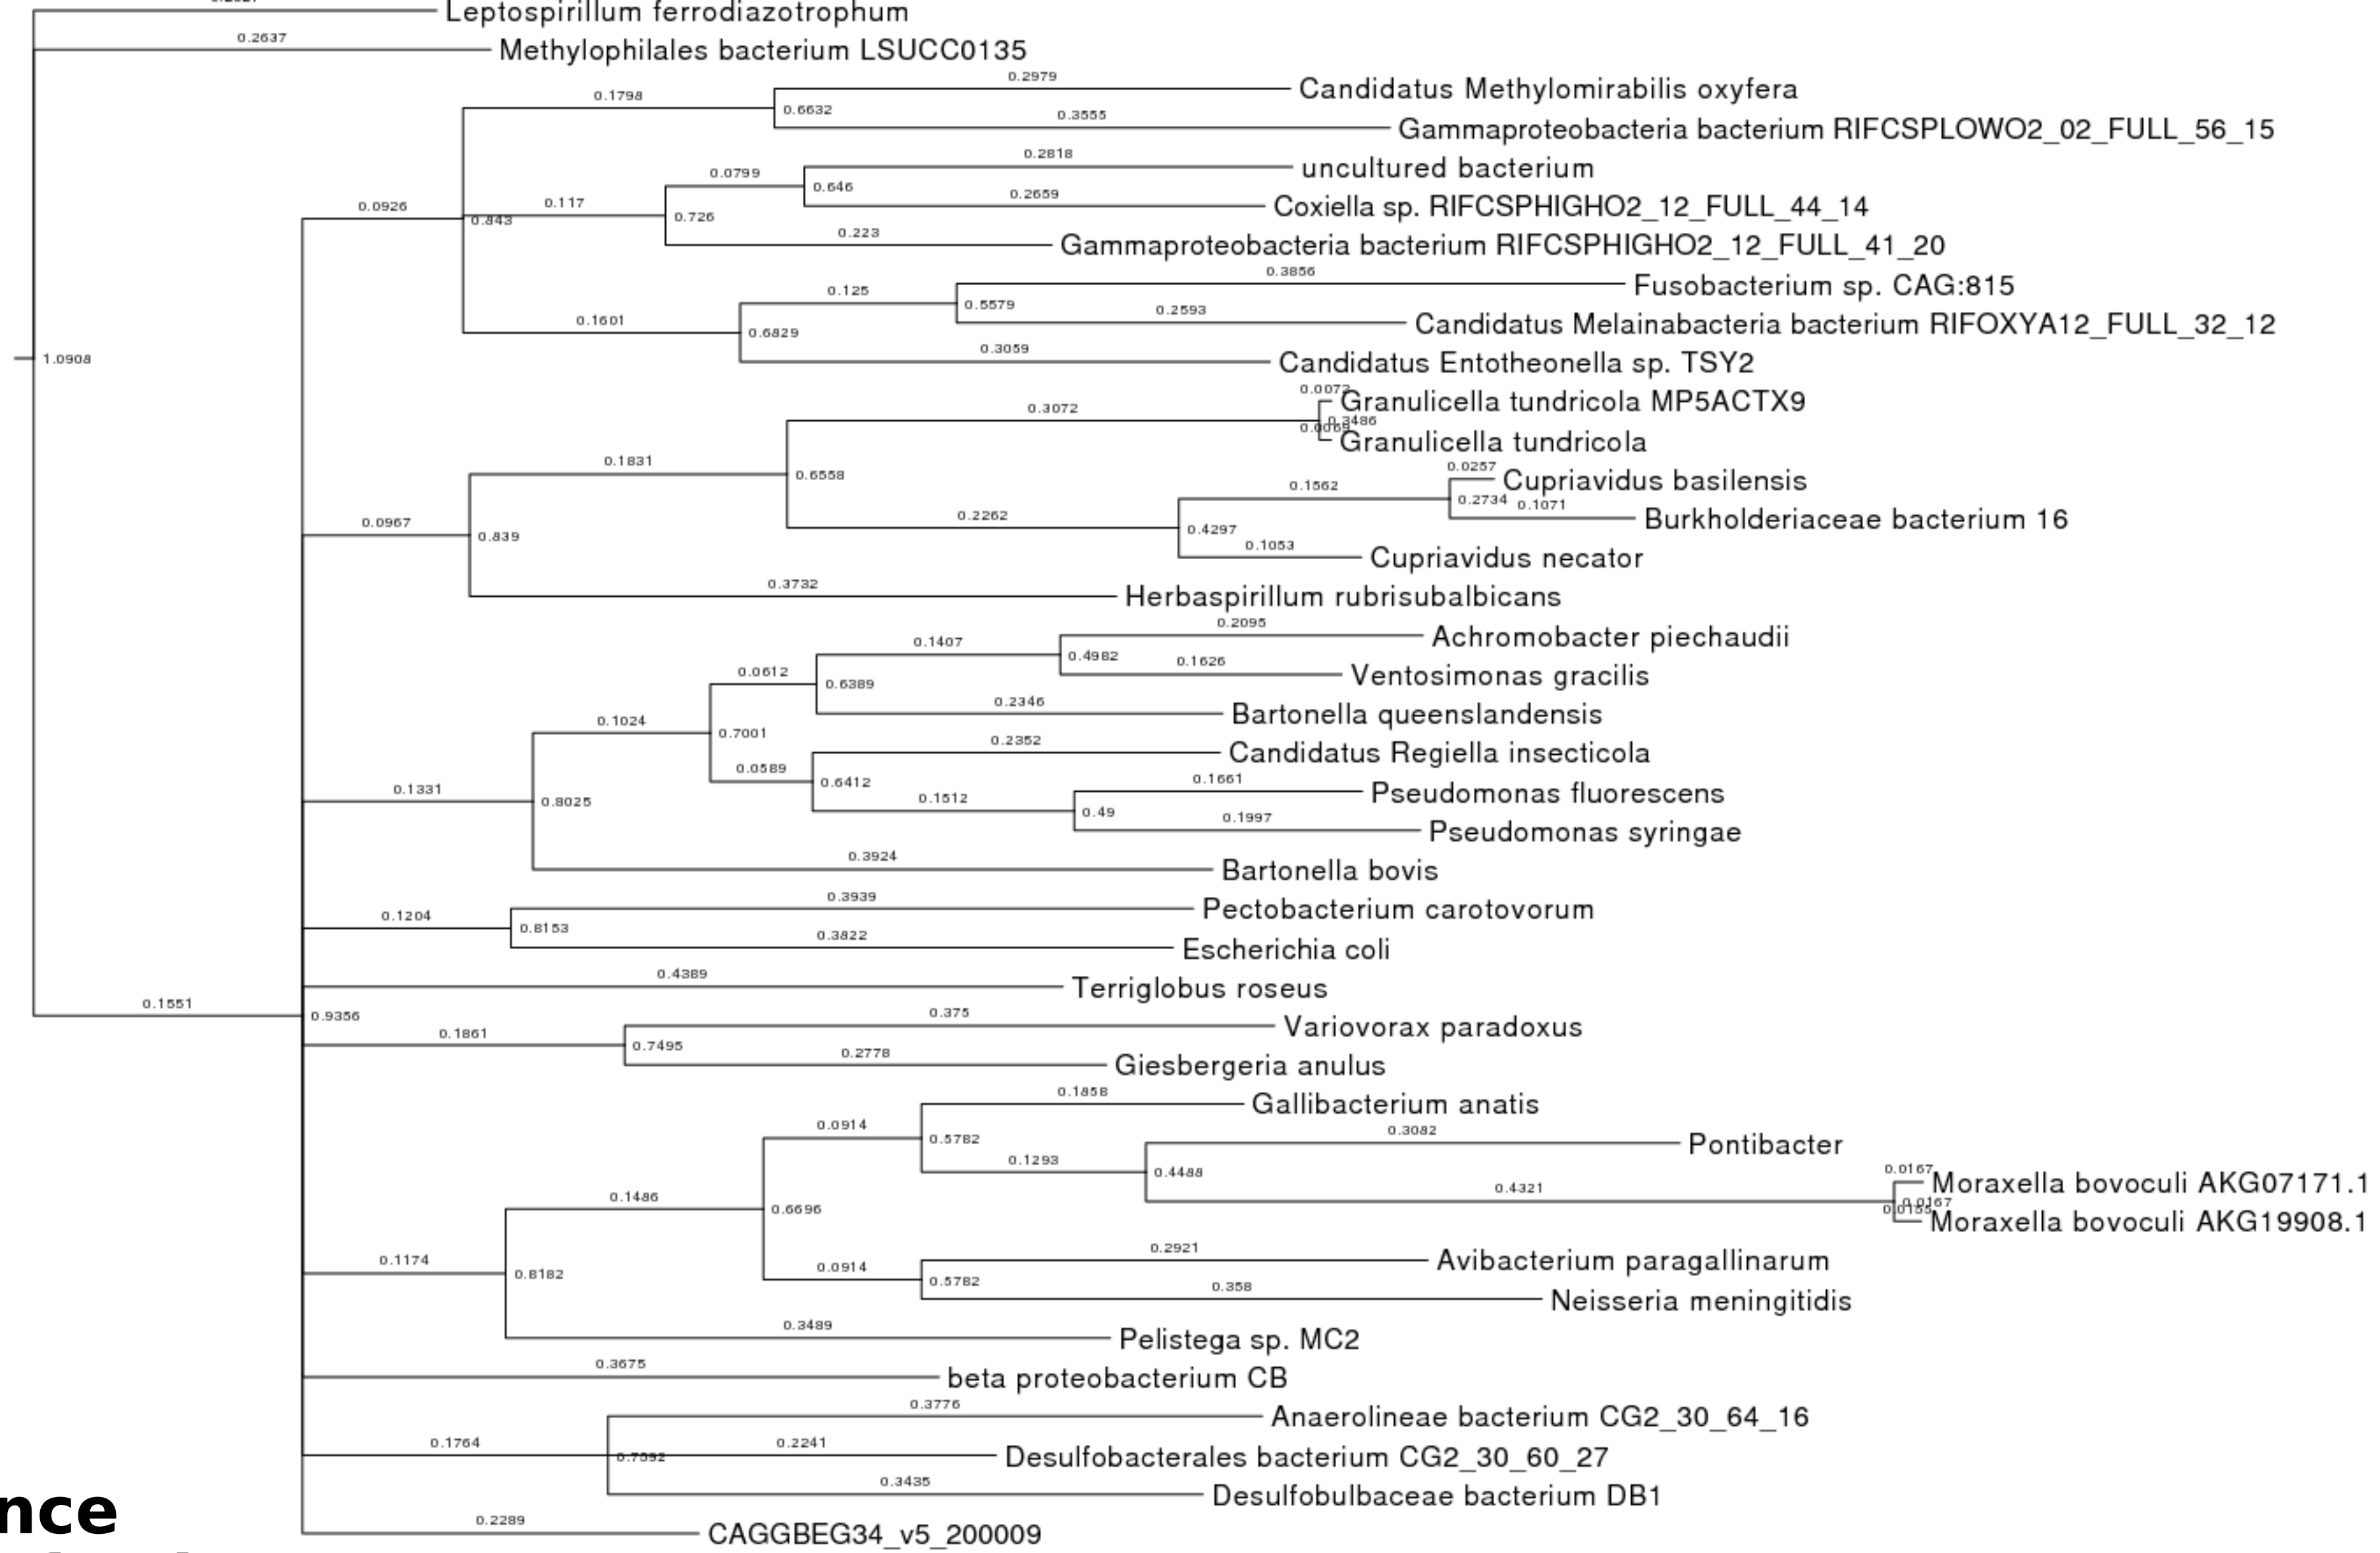

0.2

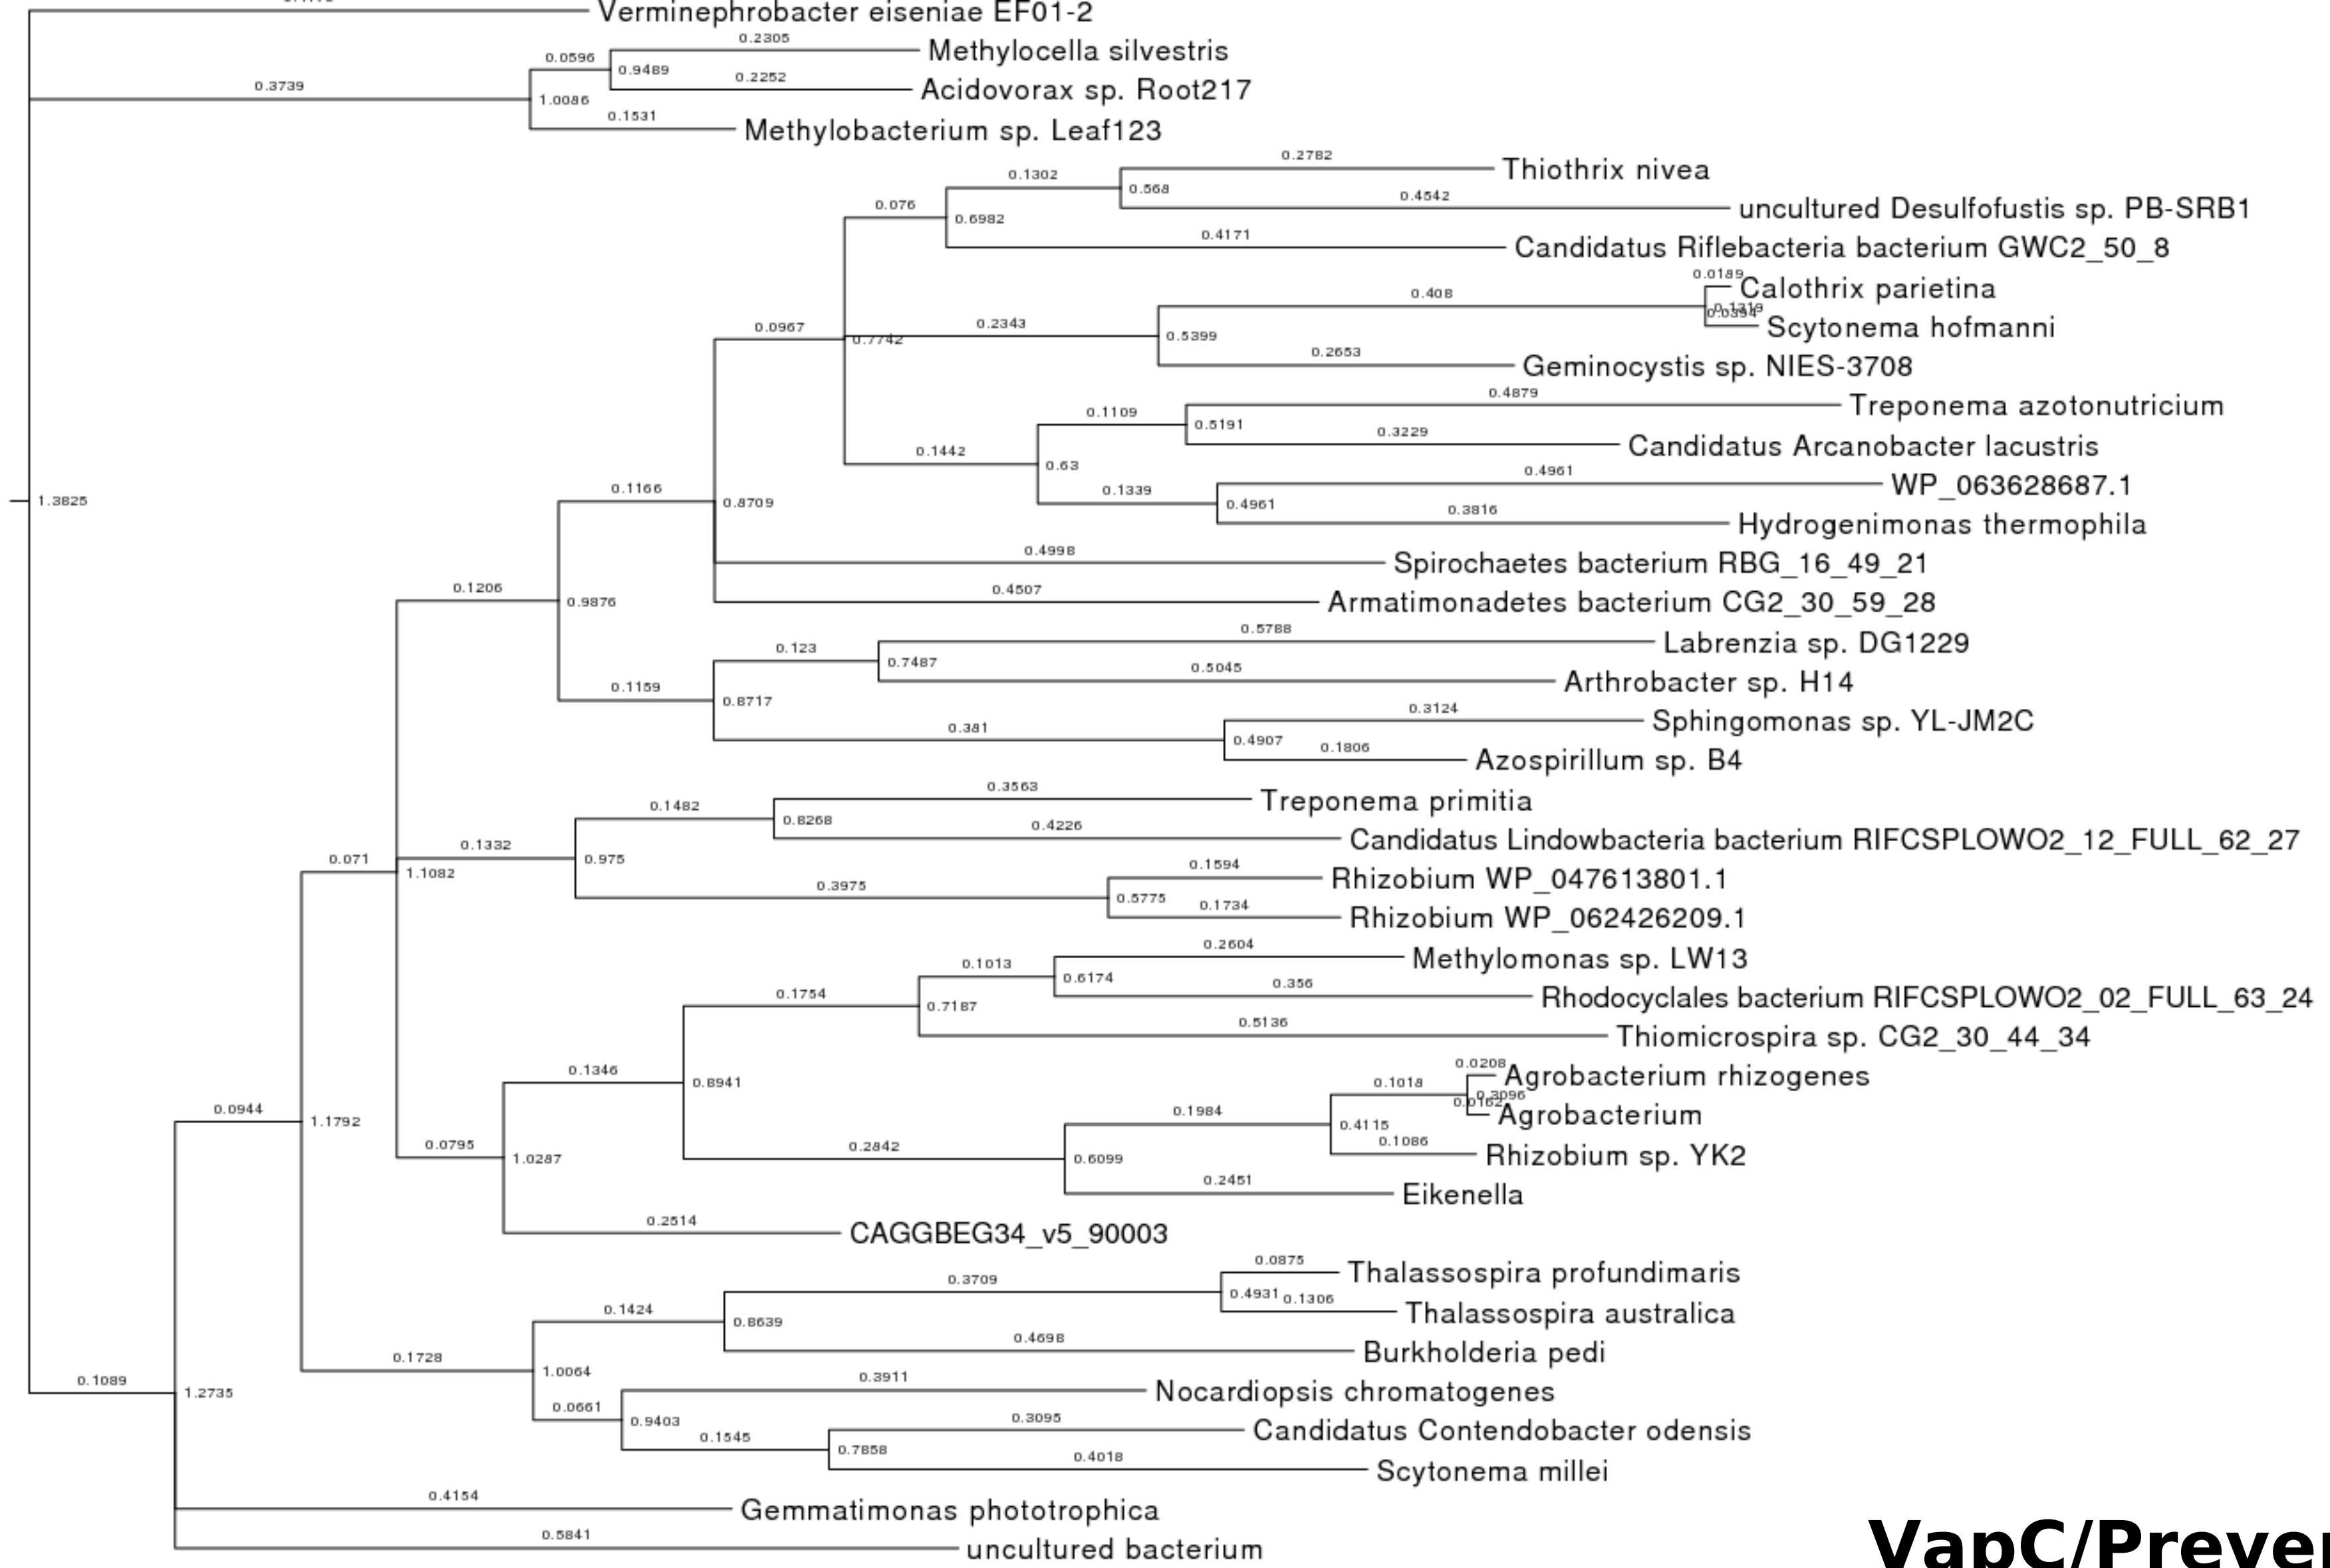

# VapC/Prevent-host-death protein

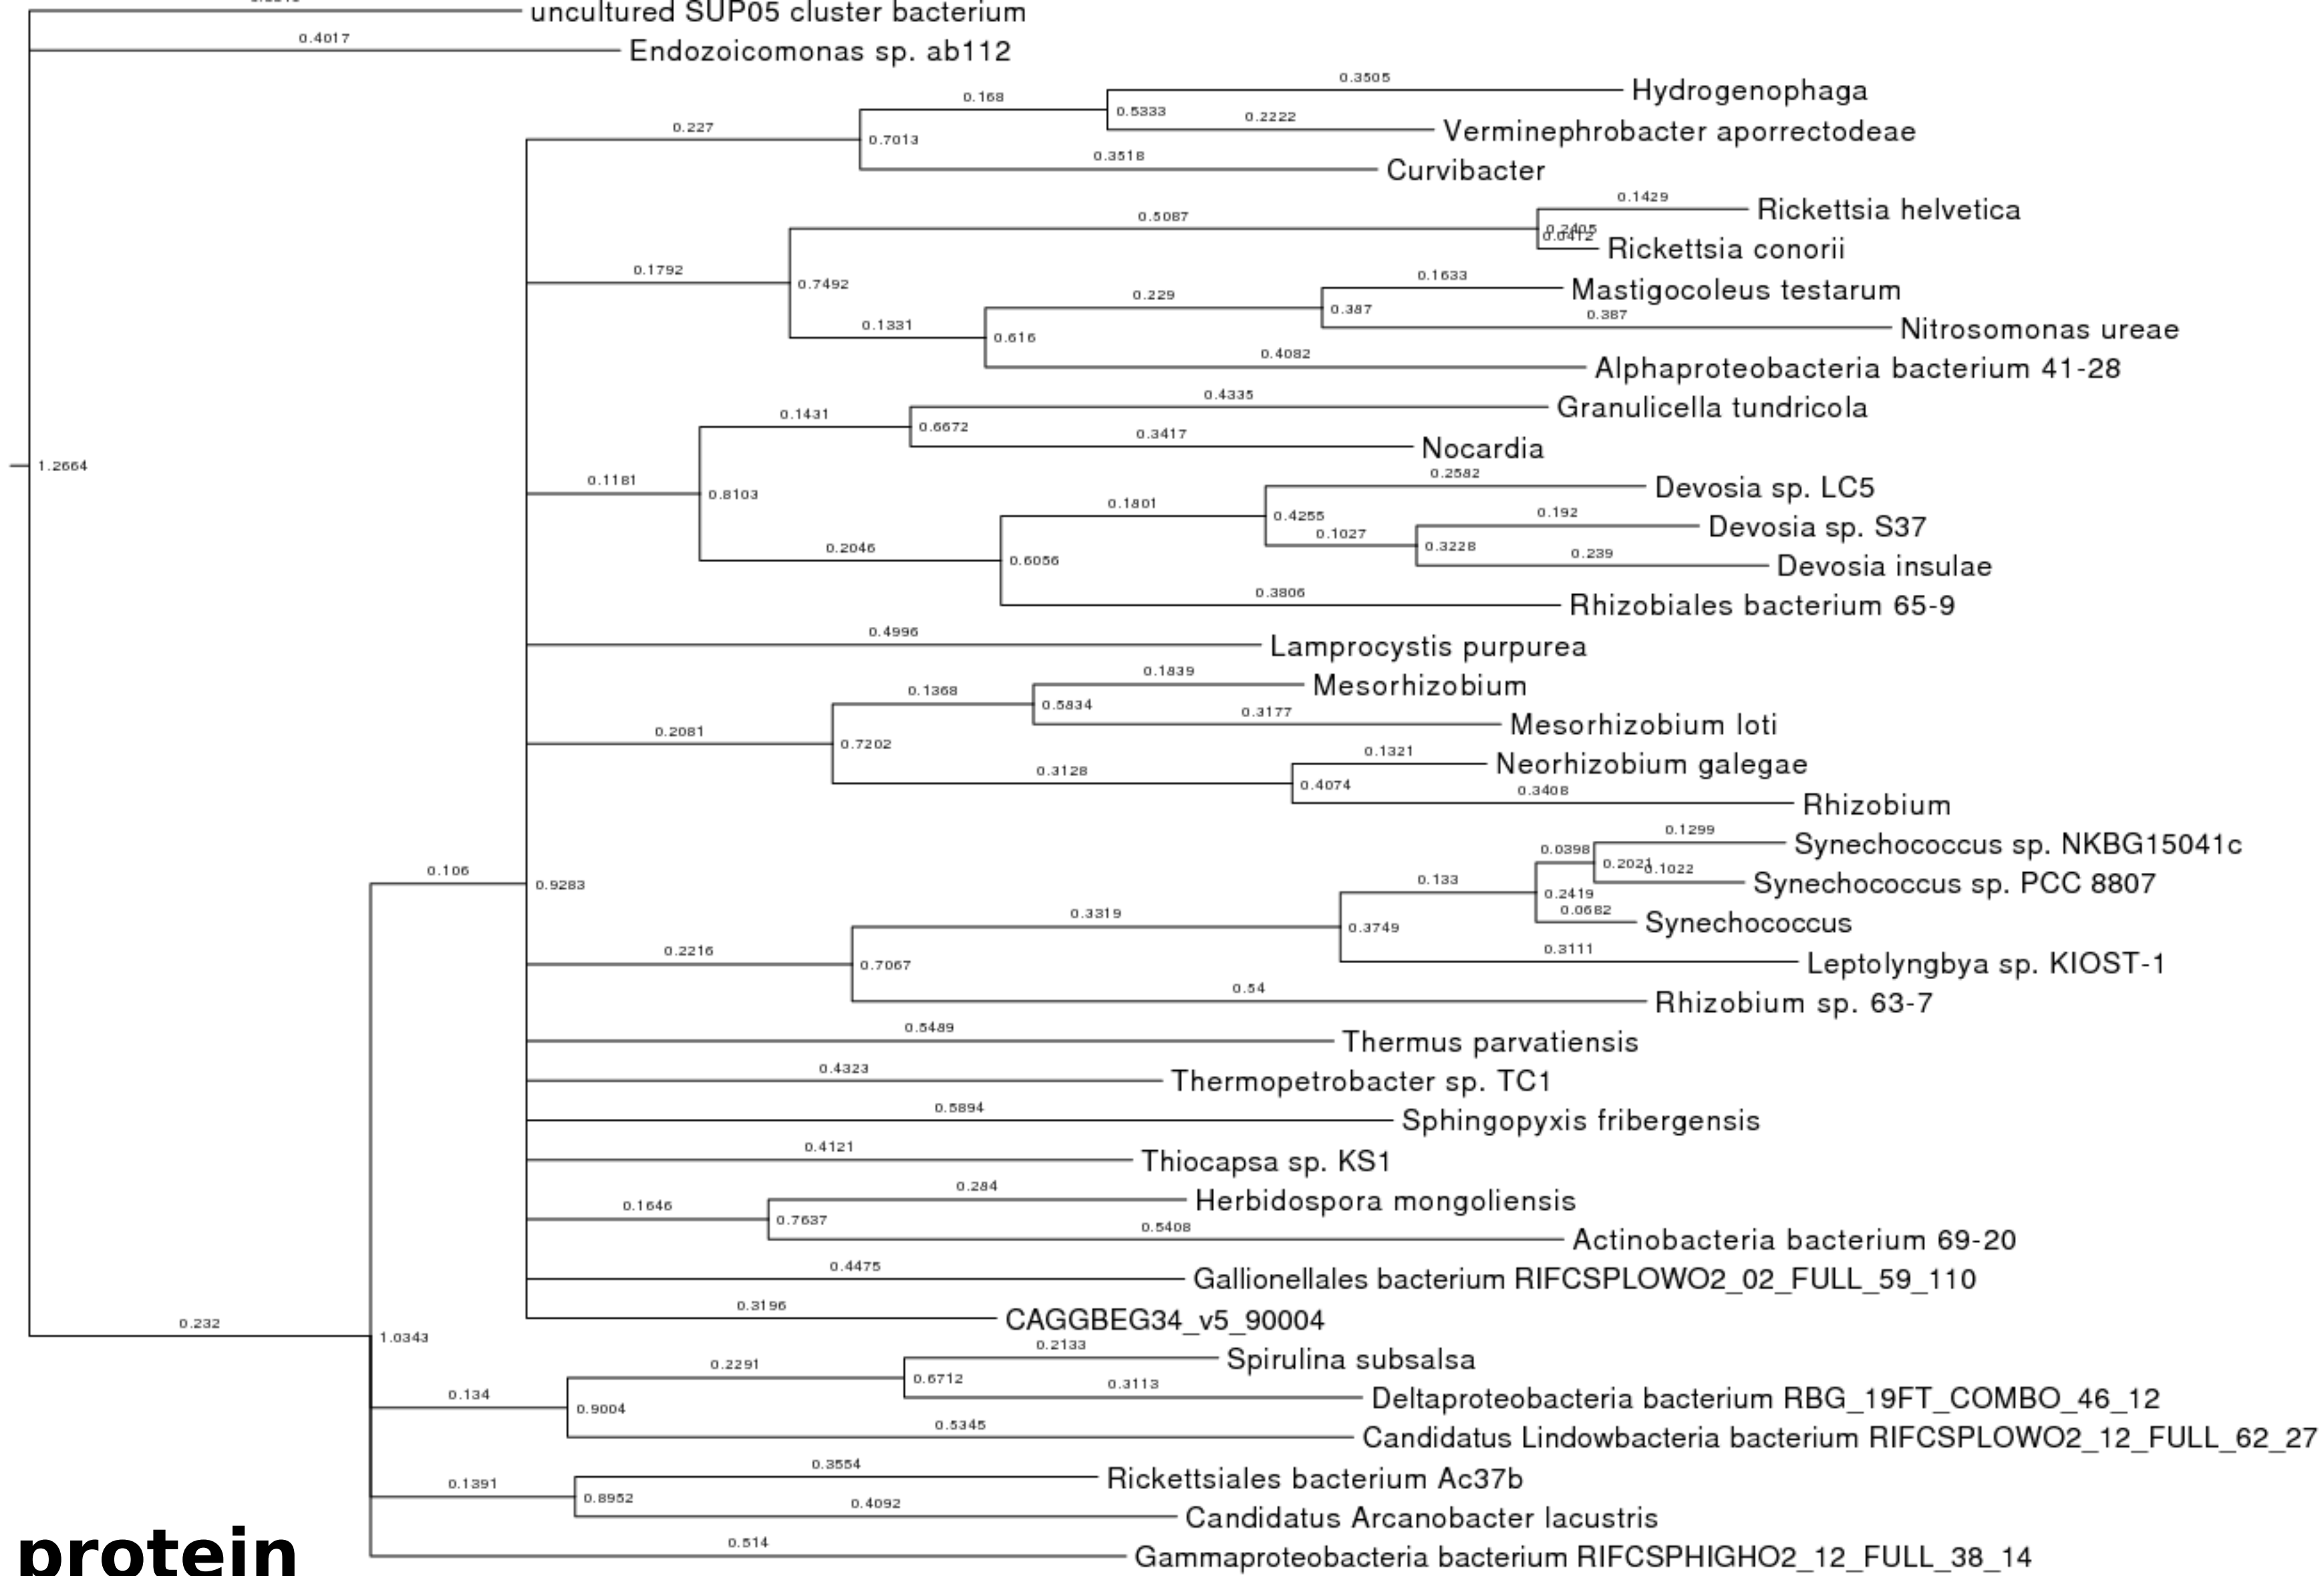

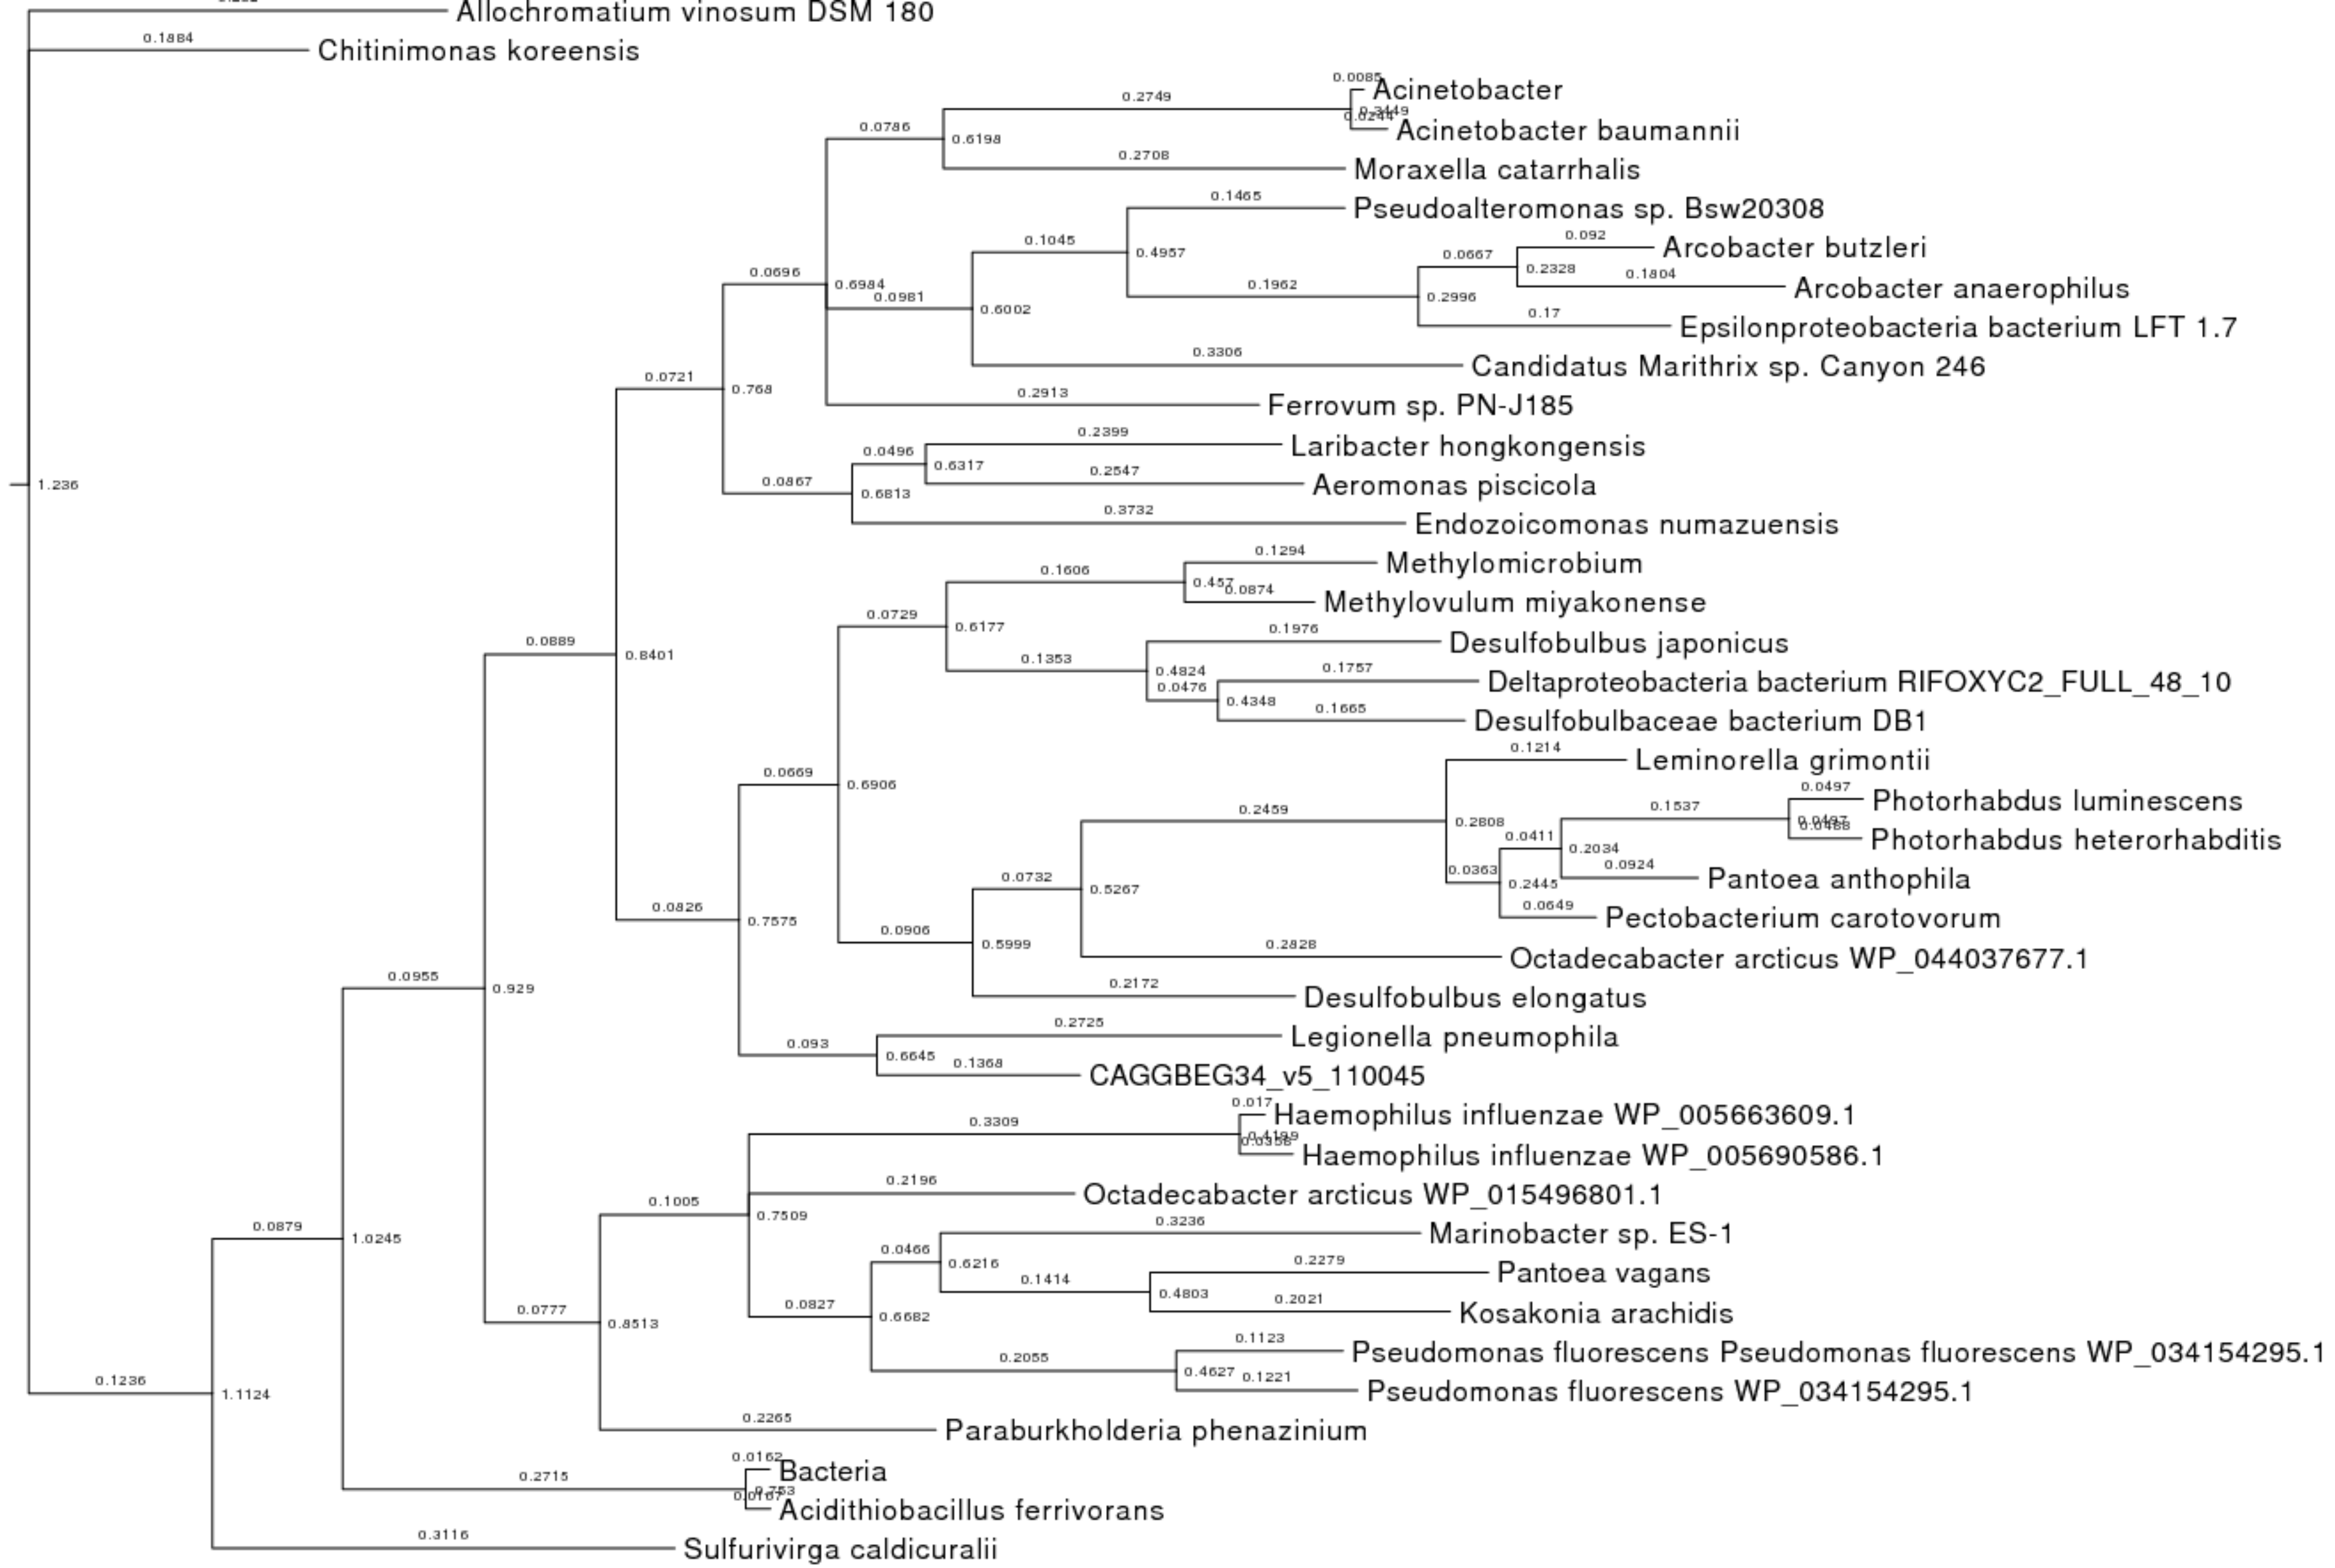

# RelE/RelB

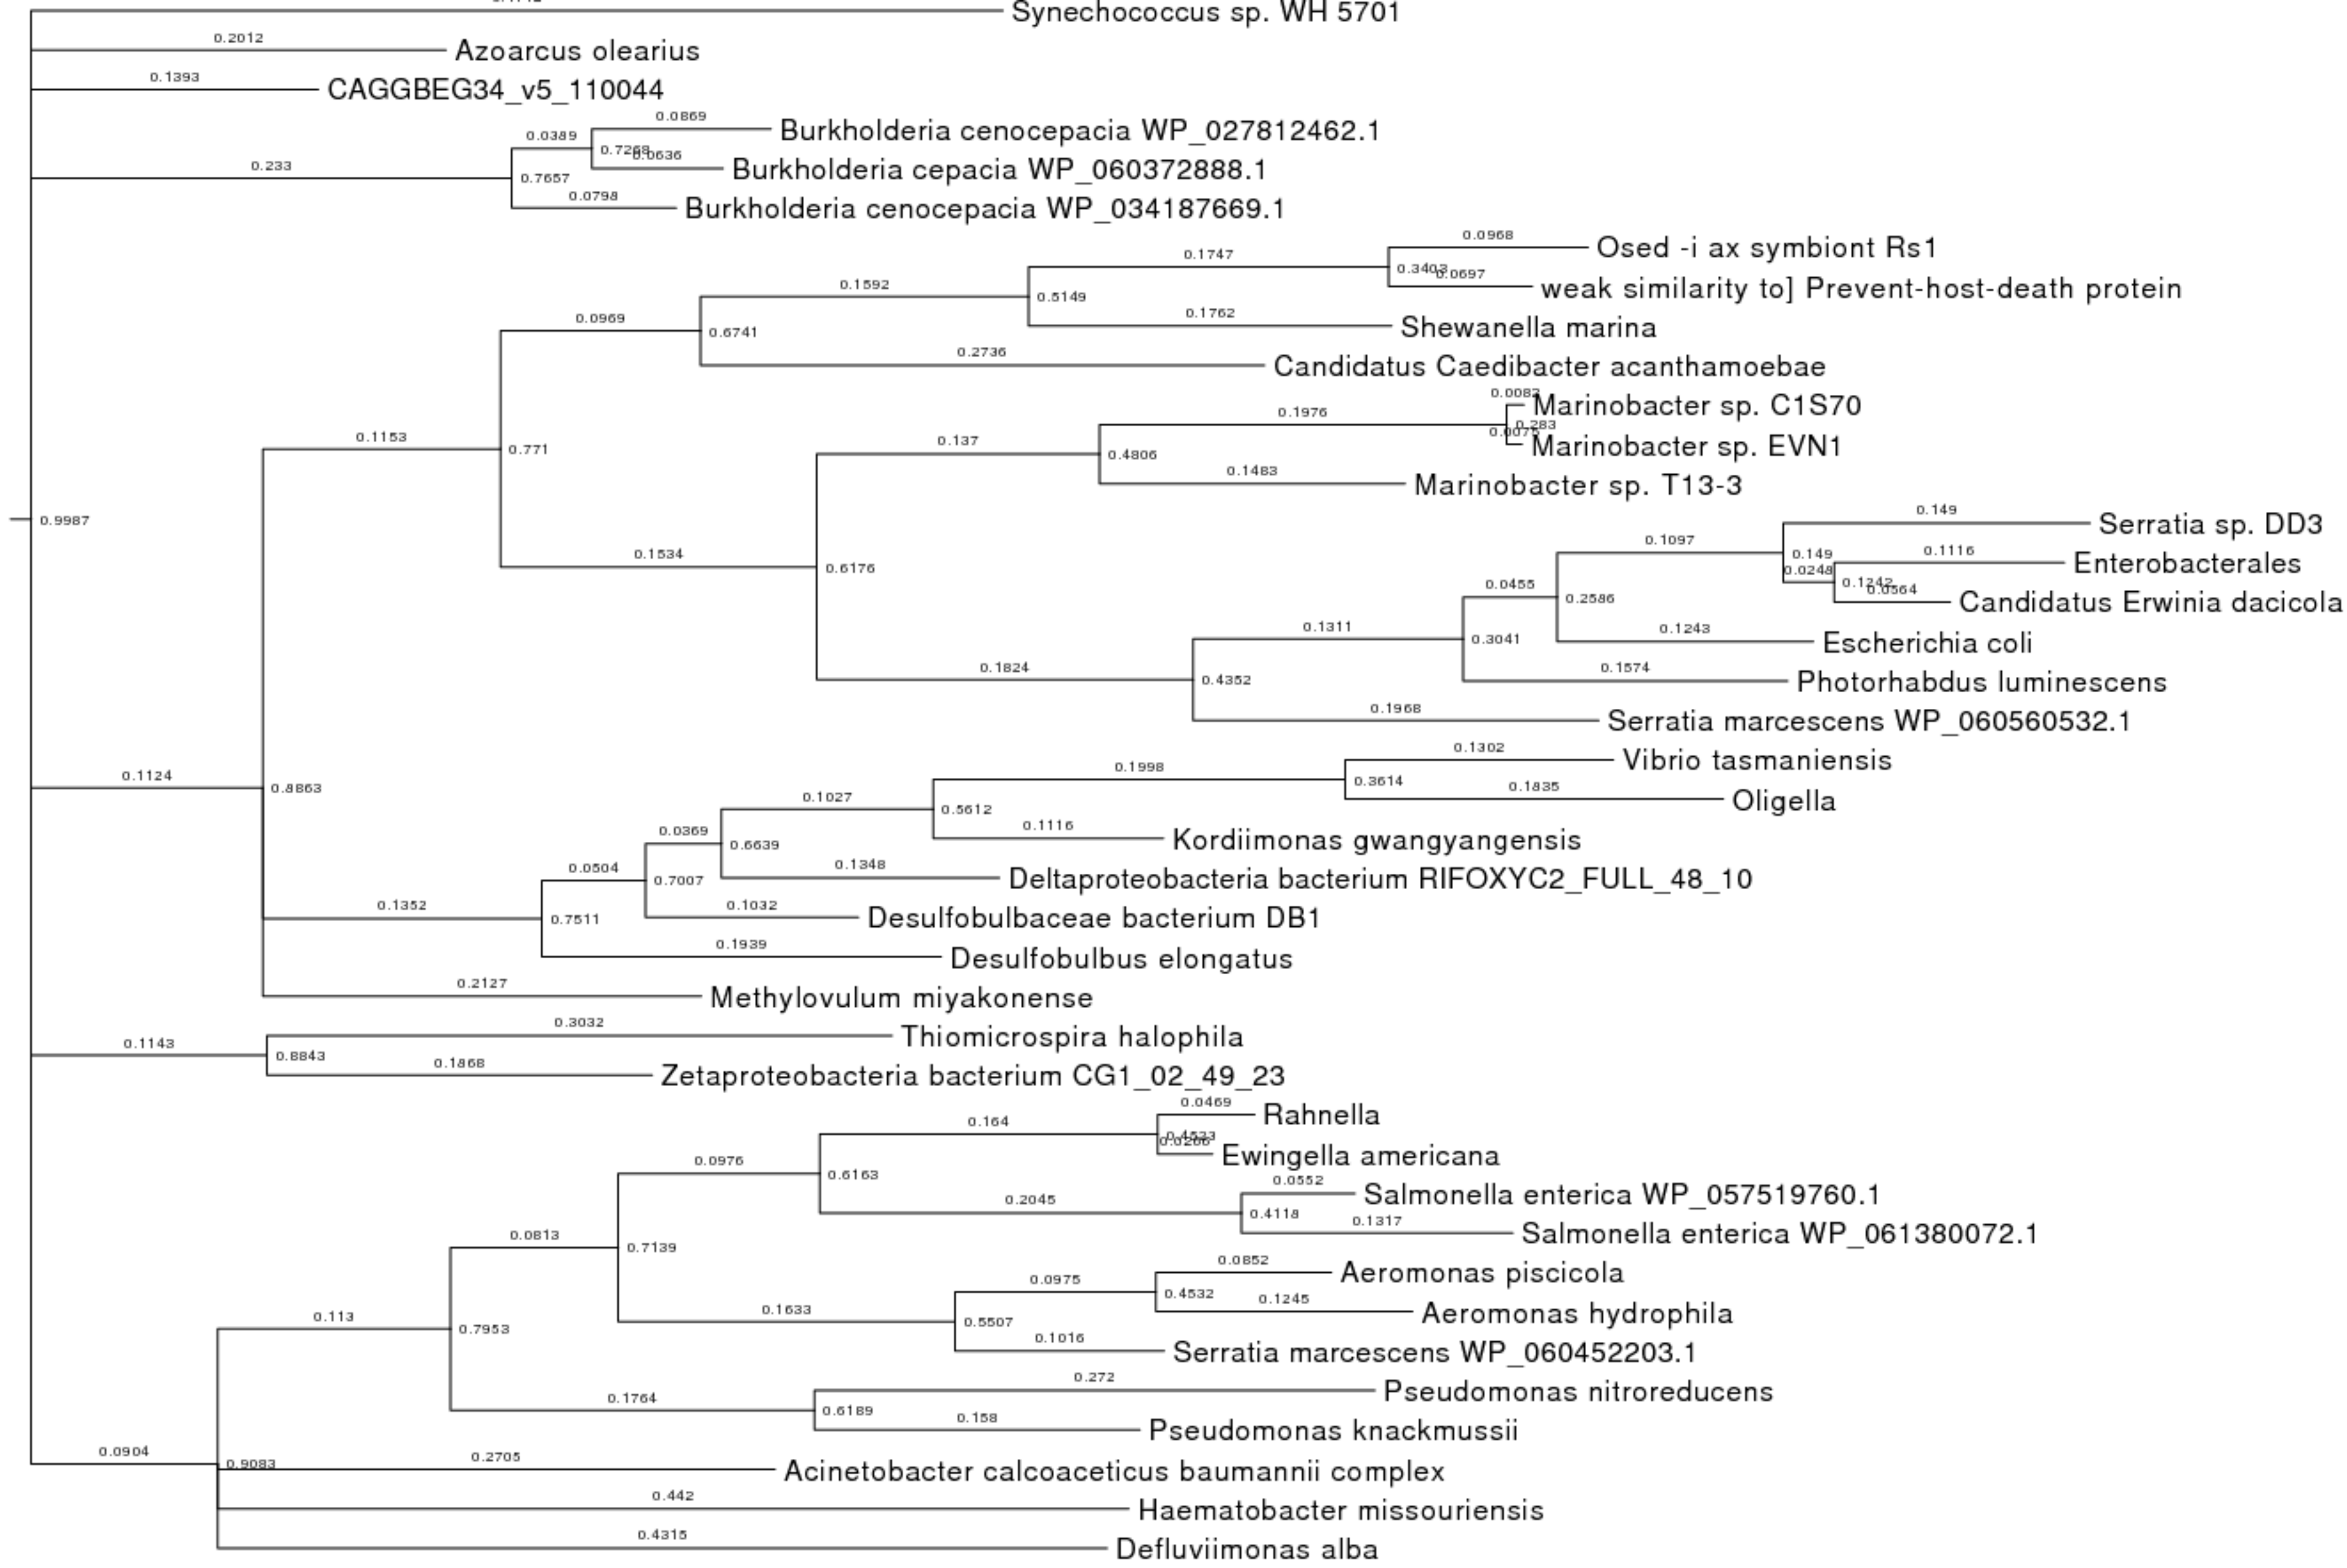

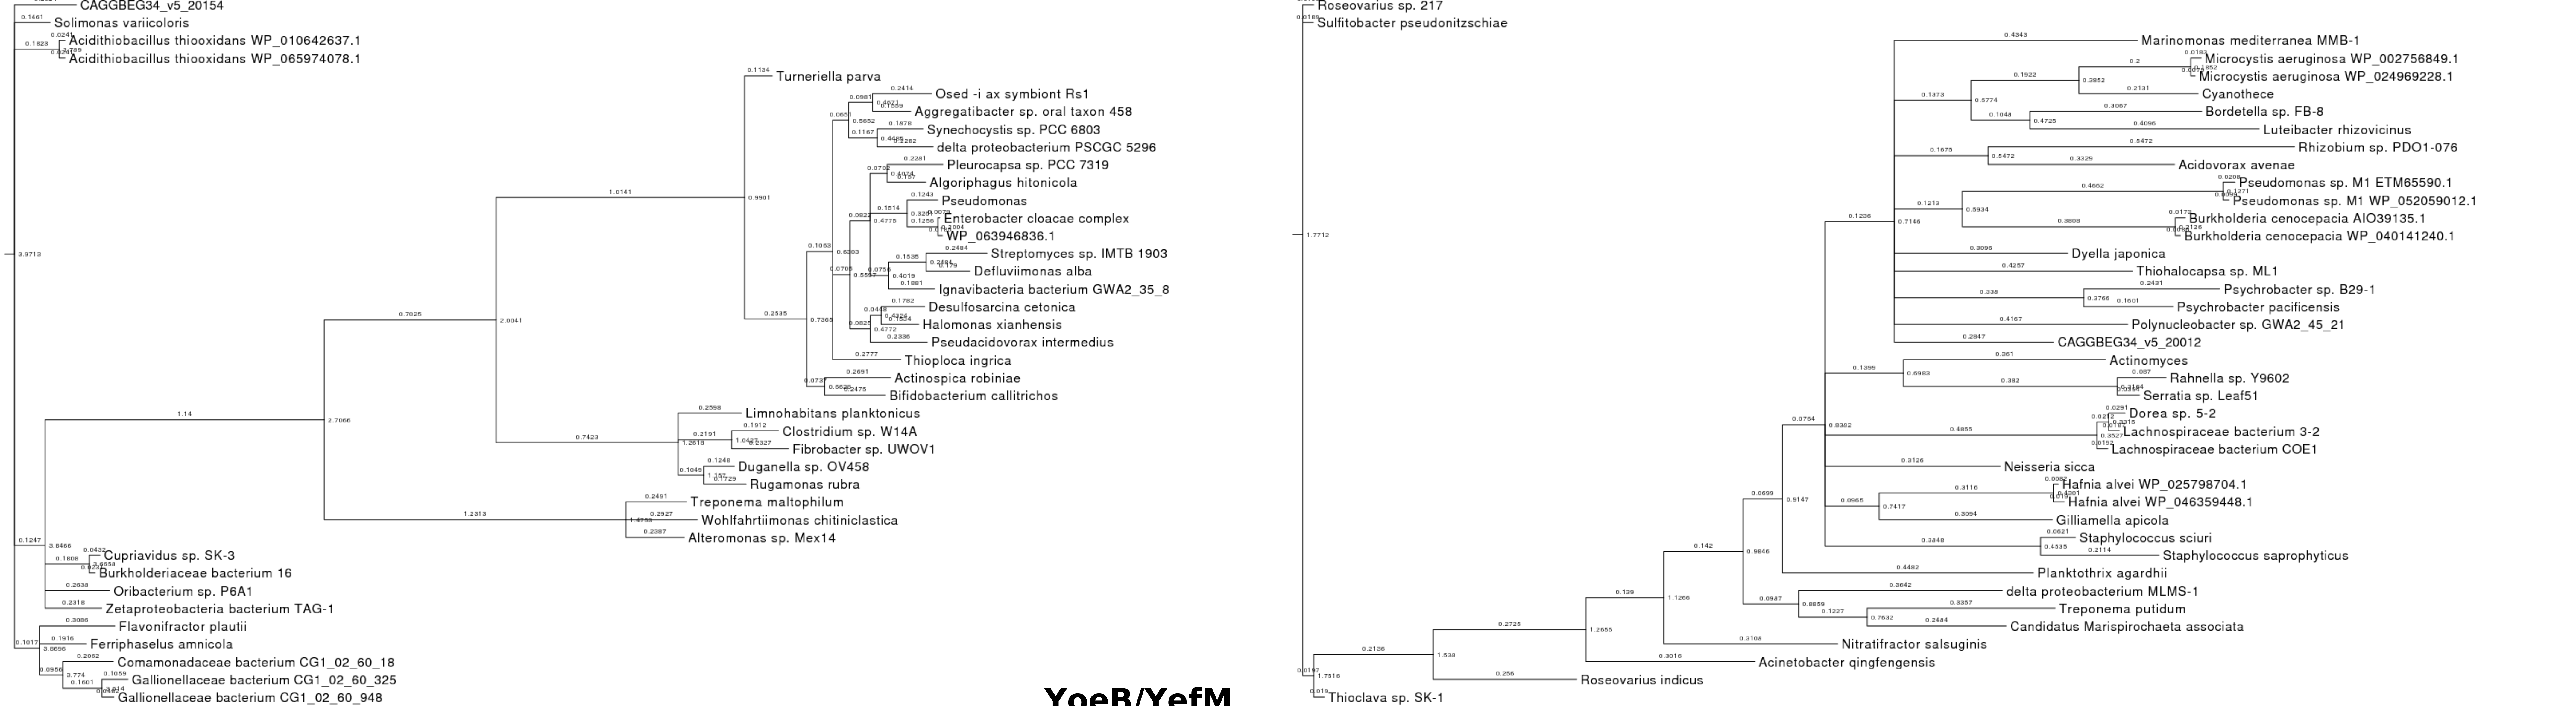

Supplement: ismej201784x2.pdf [file ismej201784x2.pdf]
