# Supplementary material
Source: PubMed Central journal article supplement (PMC5607366)

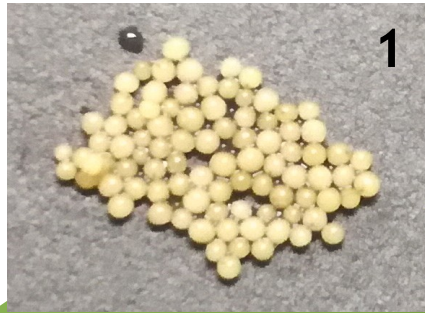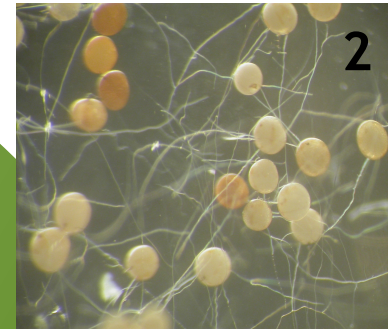

**Pre-symbiotic phase**

**AMF  
Life cycle**

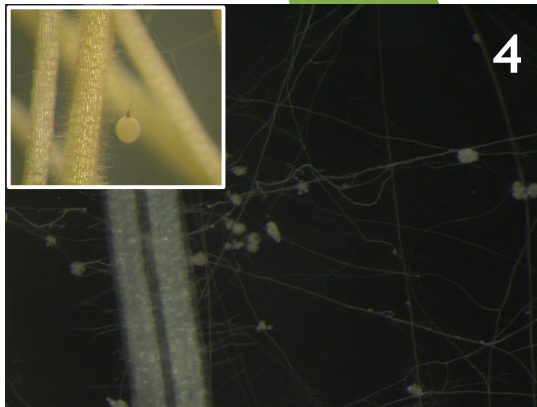

**Symbiotic phase**

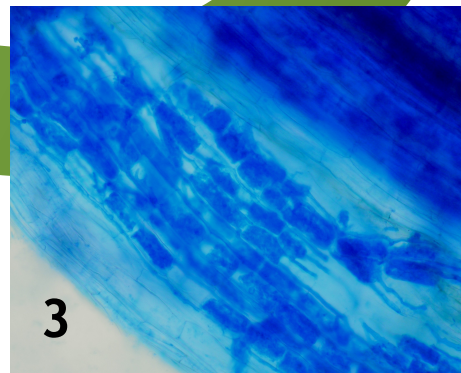

Supplement: ismej201784x3.pdf [file ismej201784x3.pdf]

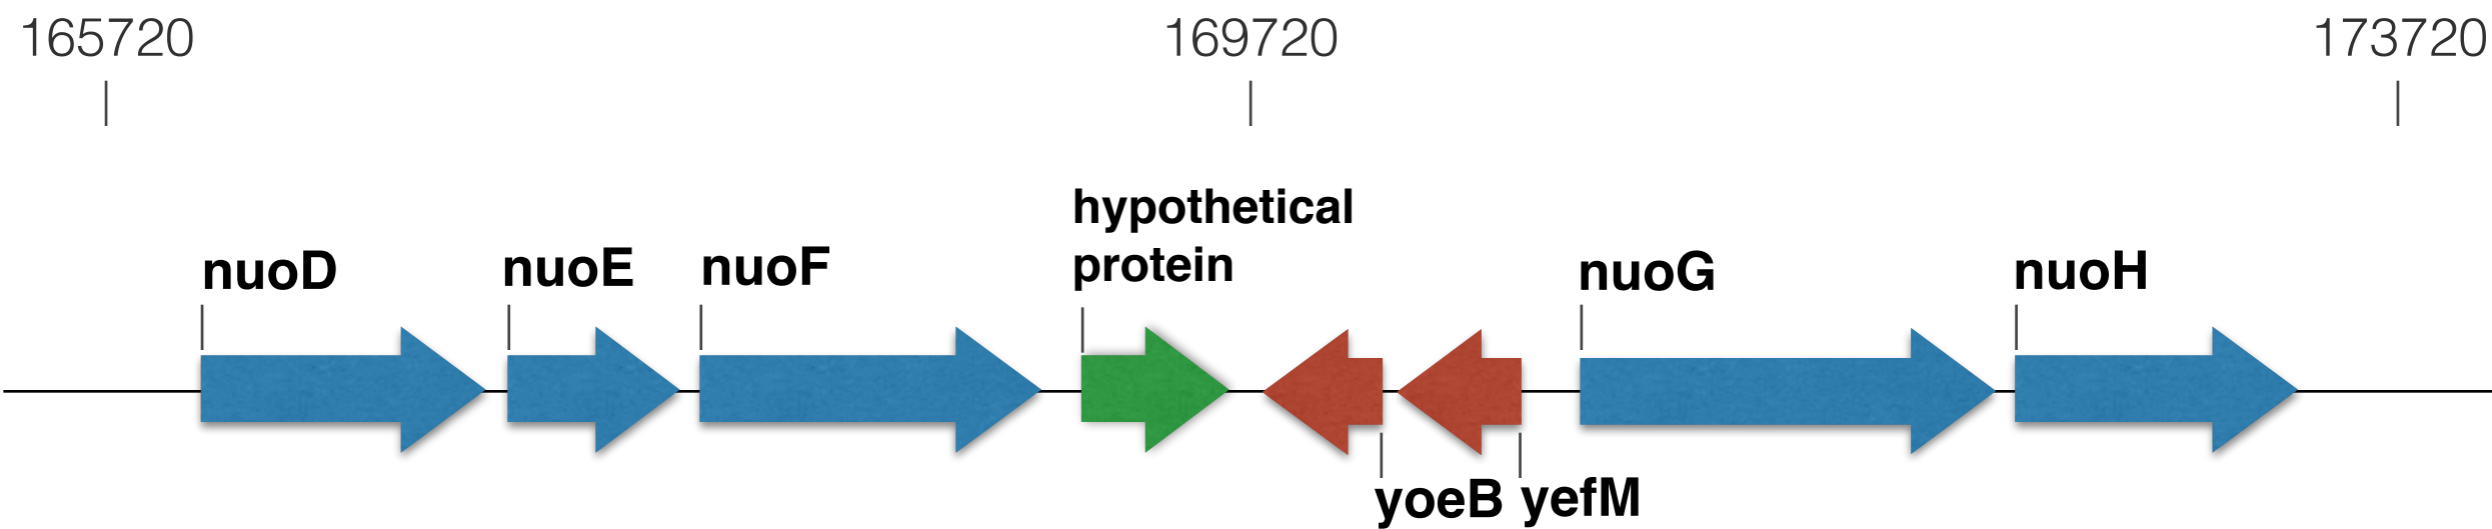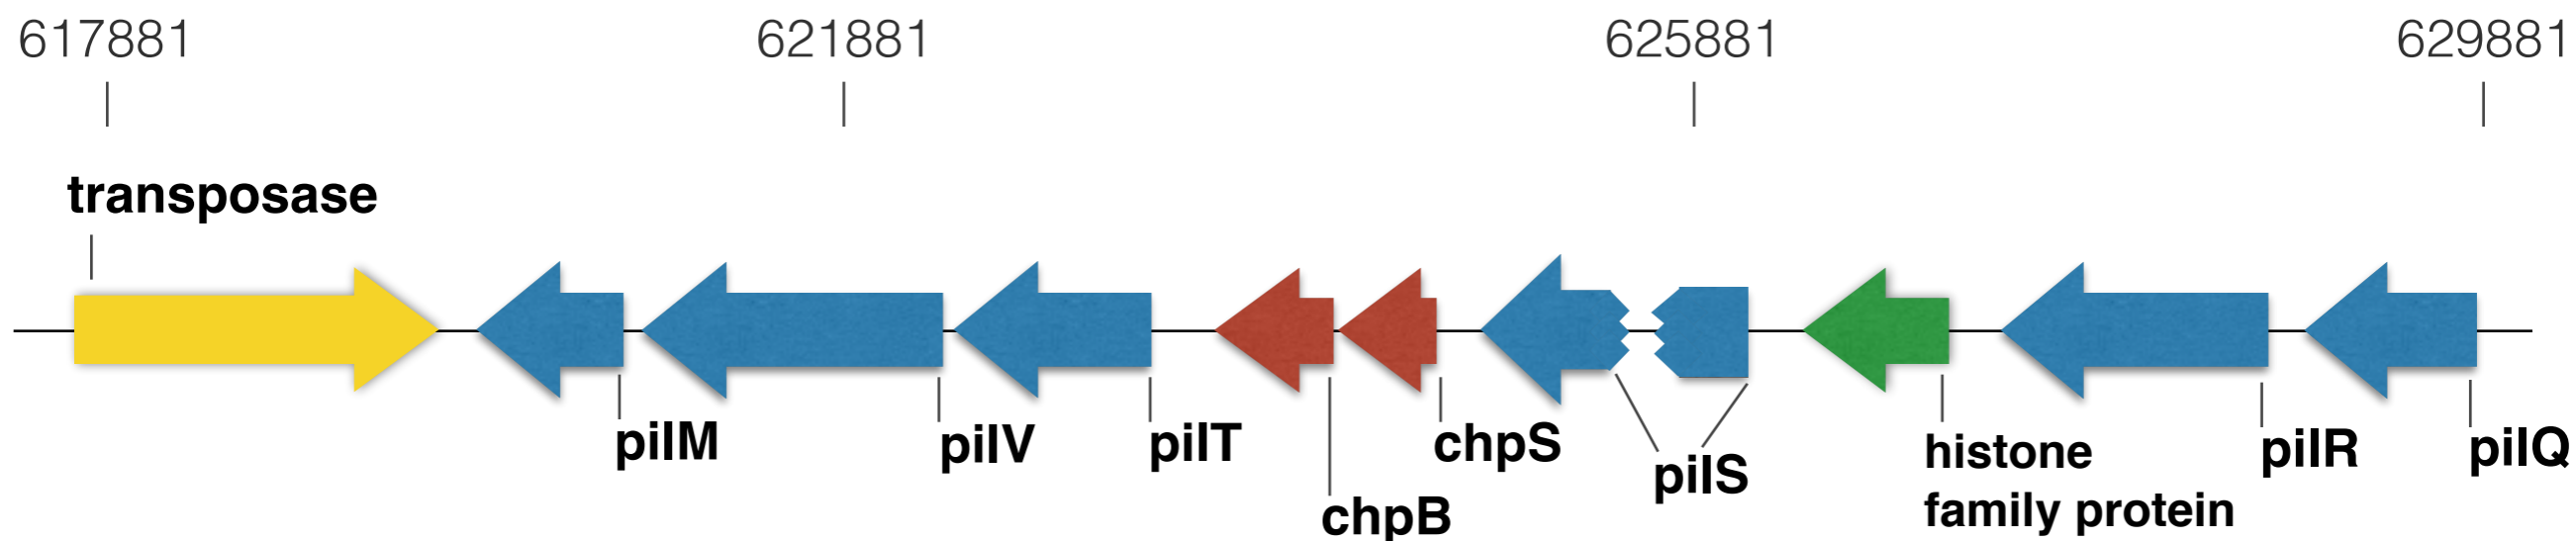

Supplement: ismej201784x6.pdf [file ismej201784x6.pdf]
